25 **Abstract**

26 The oxygen-responsive Hypoxia Inducible Factor (HIF)-1 promotes several steps of the metastatic cascade.  
27 A hypoxic gene signature is enriched in triple negative breast cancers (TNBCs) and correlates with poor  
28 patient survival. Since inhibiting the HIF transcription factors with small molecules is challenging, we  
29 sought to identify genes downstream of HIF-1 that could be targeted to block invasion and metastasis.  
30 Creatine kinase brain isoform (CKB) was identified as a highly differentially expressed gene in a screen of  
31 HIF-1 wild type and knockout mammary tumor cells derived from a transgenic model of metastatic breast  
32 cancer. CKB is a cytosolic enzyme that reversibly catalyzes the phosphorylation of creatine, generating  
33 phosphocreatine (PCr) in the forward reaction, and regenerating ATP in the reverse reaction. Creatine  
34 kinase activity is inhibited by the creatine analog cyclocreatine (cCr). Loss and gain of function genetic  
35 approaches were used in combination with cCr therapy to define the contribution of CKB expression or  
36 creatine kinase activity to cell proliferation, migration, invasion, and metastasis in ER-negative breast  
37 cancers. CKB was necessary for cell invasion *in vitro* and strongly promoted tumor growth and metastasis  
38 *in vivo*. Similarly, cyclocreatine therapy repressed cell migration, cell invasion, formation of invadopodia,  
39 and lung metastasis. Moreover, in common TNBC cell line models, the addition of cCr to conventional  
40 cytotoxic chemotherapy agents was either additive or synergistic to repress tumor cell growth.

41

42 **Keywords:** breast cancer; hypoxia; metabolism; creatine kinase; invasion, metastasis; chemotherapy

43

44

## 45 Introduction

46 A major clinical challenge in breast cancer is to treat metastatic disease. The overall survival of  
47 patients with metastatic breast cancer (MBC) remains dismal. Up to 30% of all patients will die within five  
48 years, and ~6% of patients are initially diagnosed with stage IV disease [1]. Targeting dysregulated tumor  
49 cell metabolism is a promising avenue to address drug resistance and to prolong the survival of patients  
50 [2,3]. Several metabolic pathways that are altered in tumors, including glutamine metabolism, fatty acid  
51 metabolism, and aerobic glycolysis are linked to therapeutic resistance [3].

52 The hypoxic response and the oxygen-responsive Hypoxia Inducible Factor (HIF) transcription  
53 factors play essential roles in mediating these pathways in tumors. HIF-1 and HIF-2 regulate genes that  
54 fine-tune cellular metabolism and that control cell proliferation, survival, or apoptosis [4,5]. HIF-1 is  
55 directly implicated in chemoresistance through regulation of metabolic input [5-7]. Hypoxia in general, and  
56 the HIFs, specifically, promote breast cancer metastasis and therapeutic resistance [7-9]. Using a transgenic  
57 model of MBC (MMTV-PyMT), we have shown that HIF-1 $\alpha$  is essential for tumor growth and lung  
58 metastases originating from the mammary gland [9].

59 Targeting the HIFs with small molecules remains challenging. Several HIF inhibitors have been  
60 described, but most do not discriminate between HIF-1 or HIF-2, and they indirectly impact HIF $\alpha$   
61 stability/activity [10]. Furthermore, deletion of either HIF $\alpha$  subunit is deleterious to normal development  
62 [11], suggesting potential toxicity. Finally, differential, or even competing roles, for HIF-1 $\alpha$  and HIF-2 $\alpha$  in  
63 tumorigenesis are reported [12].

64 To address these obstacles, we screened for genes downstream of HIF-1 that were differentially  
65 expressed after genetic knockout (KO) of HIF-1 $\alpha$  to identify targets potentially more amenable to  
66 therapeutic intervention. Genes implicated in cellular metabolism and/or invasion, or for which chemical  
67 inhibitors had been previously identified, were prioritized for biological validation. One gene meeting both  
68 criteria was creatine kinase, brain isoform (CKB).

69 CKB is a member of a family of four creatine kinase (CK) enzymes that reversibly transfer a high-  
70 energy phosphate group between ATP and creatine, generating phosphocreatine and ADP [13].  
71 Phosphocreatine is an essential local energy reservoir that highly metabolic tissues exploit to rapidly re-  
72 generate ATP from ADP to maintain a high ratio of ATP/ADP and to prevent local acidification near  
73 cellular ATPases [14,15]. These functions are relevant to tumors, which rely on aerobic glycolysis to  
74 produce energy and exist in an acidic microenvironment [6]. All four CK isoforms (two cytosolic, two  
75 mitochondrial) and the creatine transporter (*SLC6A8*) are direct HIF-responsive genes [16]. Neither CKB  
76 nor the mitochondrial CKMT1 are essential for development since single or compound knockout mice are  
77 viable [17]. CKB is over-expressed in several solid tumors including breast, colorectal, and ovarian [18-20].  
78 In proteomic screens of prostate, lung, and HER2+ breast cancers, CKB was elevated [21-24].

79  
80 Targeting creatine kinases is underdeveloped as an anticancer strategy targeting cellular  
81 metabolism. In the 1990s, several creatine analogs, including cyclocreatine (1-carboxymethyl-2-  
82 iminoimidazolidine, cCr), were shown to inhibit tumor growth with tolerable side effects [15].  
83 Cyclocreatine has the most similar substrate kinetics to creatine, but unlike creatine, which is actively  
84 transported into cells by SLC6A8, cCr passively enters cells. cCr therapy was reported to repress rat  
85 mammary adenocarcinoma growth [25]; however, the impact on metastasis was not tested. Cyclocreatine  
86 also inhibits tumor cell motility *in vitro* [26]. In a colon cancer model, CKB was shown to mediate the  
87 metastatic potential of cancer cells by acting as a secreted kinase to produce phosphocreatine, which  
88 accumulated in the stroma and was then re-imported into tumor cells to promote CK-dependent survival

89 to facilitate liver colonization [27]. In pancreatic adenocarcinoma, CKB was identified as a  
90 mechanosensitive transcriptional target of yes-associated protein 1 (YAP). Stiff substrates increased CKB  
91 levels and ATP production to promote collective cell invasion and chemotaxis [28]. These pre-clinical  
92 studies build upon *in vitro* observations that suggested CKB localizes in a spatially restricted manner in  
93 migrating cells to supply local ATP necessary for actin reorganization [29,30].

94  
95 We tested if the creatine phosphagen arm of metabolism may be a key player downstream of the  
96 HIFs to promote breast cancer metastasis to the lung, a predominant site of metastasis in women with  
97 triple-negative breast cancer (TNBC) [31]. Using *in vitro* and *in vivo* approaches, including genetic  
98 modification of CKB compared to cCr treatment, we conclude that breast tumor cell-intrinsic expression of  
99 CKB is required to mediate cellular metabolism and to promote metastasis in ER-negative breast cancer  
100 models. Moreover, addition of cCr to conventional cytotoxic agents represses tumor growth in an additive  
101 or synergistic manner.

102  
103

## 104 **Materials and Methods**

105

106 **PyMT mammary tumor epithelial cells (MTECs).** HIF-1 WT and KO MTECs were maintained as in [9].  
107 All cells were cultured at normoxia (ambient air) or exposed to hypoxia (0.5% O<sub>2</sub>) in a multi-gas incubator  
108 (acutely, ≤ 6h, or chronically, 16-24h).

109

110 **RNA extraction, gene expression microarray analysis and qPCR.** RNA preparation and array processing  
111 protocols are reviewed in the Supplementary Methods. Raw data were transformed to the log<sub>2</sub>-scale, and  
112 normalized log-scale intensity values analyzed for differential expression using Expander. All genes with  
113 a mean fold-differential ≥ 2.0 ( $p < 0.05$ ) are included in gene lists (**Supplementary Tables S1-S3**), and can be  
114 assessed in GEO (GSE183694). qPCR was performed on a Roche LC480 instrument using primer and probe  
115 sets designed by the Universal Probe Library (UPL) assay design center; all primers are listed in  
116 **Supplemental Table S4.**

117

118 **Immunofluorescence of cultured cells.** Cultured cells were stained using standard indirect  
119 immunofluorescence staining procedures, reviewed in the Supplementary Methods. A list of all antibody  
120 reagents is included in **Supplementary Table S5**. Slide images were captured on a Nikon inverted ECLIPSE  
121 Ti2 microscope using NIS-Elements software and the enhanced intensity projection module compiled  
122 images from multiple z-stacks.

123

124 **Protein extraction and western blotting.** Cell extraction and western blotting was performed as in [9].  
125 Western blotting details are included in the Supplementary Methods.

126

127 **Creatine kinase enzymatic activity assay.** Protein extracts were analyzed by a CK assay (cat.#: C712-39,  
128 Pointe Scientific, Canton, MI) and activity was normalized to total protein content.

129

130 **Patient database mining.** Please refer to the Supplemental Methods.

131

132 **Chromatin immunoprecipitation (ChIP) assays.** Refer to Supplemental Methods for identification of  
133 HREs, sample preparation and ChIP analysis methods. Primers were designed to putative independent  
134 HRE sites, as well as to non-HRE sequences in the promoter regions (**Supplementary Table S6**). DNA was  
135 sheared to 500bp and ChIP was performed using antibodies against HIF-1<sup>®</sup> or anti-rabbit IgG control and  
136 raw data analyzed as in [68].

137 **Generation of PyMT *Ckb* knockdown cells.** Stable shRNA *Ckb* knockdown is described in the  
138 Supplemental Methods using targeting sequences listed in **Supplementary Table S7**. Two constructs, sh59  
139 and sh61, produced >70% knockdown (**Supplementary Fig. S2A-B**).

140  
141 **PyMT cell proliferation assay by WST-1.** Cell growth in response to gene KD or to cCr treatment was  
142 measured as described in the Supplemental Methods.

143  
144 **Wound healing assays.** Wound healing assays were performed using a tip scratch method or using the  
145 wound healing protocol in 96-well format for the IncuCyte S3 live cell imager as described in the  
146 Supplemental Methods.

147  
148 **Transient ectopic expression of CKB in MDA-MB-231 cells.** MDA-MB-231-NR (NucLight red) cells  
149 (provided by Sartorius; RRID:CVCL\_DF48) were transfected with FuGene HD reagent (Promega, Madison,  
150 WI) with 3 µg of either pCMV-6-Entry vector (OriGene, cat# PS100001, Rockville, MD) or pCMV-6-Entry  
151 expressing the CKB TrueORF (cat#RC203669); cells were selected with neomycin (2 mg/mL).

152  
153 **Invasion assays.** Invasion assays were performed as in [9], with modifications as described in the  
154 Supplemental Methods.

155  
156 **Intracellular ATP Assay.** Intracellular ATP levels were compared as in [69], with modifications as  
157 described in the Supplemental Methods.

158  
159 **Seahorse bioanalyzer assays.** PyMT cells were seeded into Seahorse XFe-96 sensor plates (Agilent  
160 Technologies, Santa Clara, CA) to produce near confluence within 18h. The next day, the plate was  
161 transferred to the Department of Pediatrics Bioenergetics Core for profiling on the XFe96 Extracellular Flux  
162 Analyzer. Cells were switched to an XF base medium supplemented with L-glutamine (2 mM) for the XF  
163 Cell Glyco Stress test or with glucose (10 mM), L-glutamine (2 mM), and sodium pyruvate (1 mM) for the  
164 XF Cell Mito Stress test. Cells were equilibrated for 1h prior to analysis of extracellular acidification rate  
165 (ECAR) or the oxygen consumption rate (OCR). After each run, cell number was quantified using  
166 CyQUANT dye (Thermo Scientific). Metabolic rates were calculated using the Seahorse XF report  
167 generator, and data imported into Prism 9.0 for analysis.

168  
169 **Chemotaxis assays.** Chemotaxis assays were performed in the IncuCyte S3 imager as recommended by  
170 Sartorius; additional experimental details are provided in the Supplemental Methods. MDA-MB-231-NR  
171 cells transiently transfected with pCMV-6-Entry +/- mCKB were seeded at a density of 1,000 cells/well of a  
172 ClearView chemotaxis plate (cat. #4582; n=4-6 replicates/cell line), which allows cell tracking in real-time.  
173 Cells were exposed to a reservoir containing DMEM +10% FBS as the chemoattractant and the chemotaxis  
174 software tool used to quantify cell migration. Raw data were normalized for initial plating density prior to  
175 export to Prism 9.0.

176  
177 **Cell cycle analysis.** Cell cycle analysis was performed as previously described [70]. Additional details are  
178 provided in the Supplemental Methods.

179  
180 **PyMT primary tumor generation.** PyMT EV, HIF-1 KO, sh59 *Ckb* KD, and sh61 *Ckb* KD MTECs were  
181 dissociated into single cells, diluted 1:1 in growth factor reduced Matrigel (BD Biosciences):HBSS, and  
182 injected into the cleared inguinal mammary fat pads of recipients (50,000 cells/10 µl). Tumor volume was  
183 measured with digital calipers [9]. Primary tumors were resected (@~500 mm<sup>3</sup>) in a survival surgery under  
184 anesthesia and mice allowed to survive until moribund due to metastasis.

185 **Tissue immunohistochemistry and quantification.** Immunostaining was performed similar to [9];  
186 additional details regarding quantification are provided in the Supplemental Methods.

187  
188 **Tail vein assays in PyMT mice.** PyMT EV, sh59, and sh61 *Ckb* KD cells ( $1 \times 10^6$ ) were injected via the tail  
189 vein, mice were sacrificed after 21 days, and lungs inflated with formalin. Lung sections representing every  
190 100  $\mu\text{m}$  were stained with H&E and metastasis scored [9]. To test cCr efficacy, PyMT EV cells were injected,  
191 and allowed to seed the lungs for 24h. cCr dosing regimen was based on [25]. Mice were treated with  
192 vehicle (0.9% saline, daily, IP) or cCr (1g/kg, daily, IP) beginning day 1 post-injection. In an additional  
193 cohort, treatment with cCr was delayed until 7 days post-injection (after micro-metastases had formed) and  
194 on day 21 all mice were euthanized.

195  
196 **Invadopodia assays using human TNBC cells.** Assays are described in the Supplemental Methods. Briefly,  
197 glass coverslips were coated with OregonGreen-gelatin (cat. #G13186, ThermoFisher) [48]. Cells (BT549,  
198 12,000/well or MDA-MB-231, 15,000/well) were seeded onto coverslips in growth media containing  
199 batimistat (10  $\mu\text{M}$ ; cat. # SML0041, Sigma) and incubated overnight. The next day, the media was replaced  
200 with fresh growth media to allow invadopodia to form, or cCr (25 mM) was also added. Plates containing  
201 seeded coverslips were placed into the IncuCyte imager and green fluorescence and phase contrast data  
202 collected ( $n=16$  images/coverslip/time point). Green fluorescent area was normalized to seeding density per  
203 image and graphed as a ratio of change over time. At the end of the imaging, as optimized per cell line,  
204 coverslips were fixed and immunostained prior to mounting directly onto glass slides and imaged on a  
205 Nikon ECLIPSE Ti2 microscope.

206  
207 **Growth inhibition during chemotherapy treatment.** Live-cell imaging to enumerate human TNBC cells  
208 treatment in response to cCr monotherapy, or in combination with paclitaxel or doxorubicin, as well as  
209 calculation of the drug combination index (CI) is described in the Supplemental Methods.

210  
211 **Statistical analysis.** Unless otherwise stated, all data were entered into Prism 9.0 (Graph Pad, San Diego,  
212 CA) and analyzed using one-way or two-way ANOVA, followed by multiple pairwise comparison tests (*t*-  
213 tests). If standard deviation was not similar between two groups, Welch's correction was applied. Graphs  
214 show the mean  $\pm$  SEM and significance was determined with a 95% confidence level; *p*-values are indicated  
215 by asterisks, \* $p < 0.05$ , \*\* $p < 0.01$ , \*\*\* $p < 0.001$ , \*\*\*\* $p < 0.0001$ .

## 216 217 **Results**

### 218 219 ***Ckb* is a HIF-1 $\alpha$ dependent target in breast cancer**

220 Tumor cell-intrinsic HIF-1 $\alpha$  is required for mammary tumor growth and lung metastasis in the  
221 MMTV-PyMT mouse model [9]. To identify genes downstream of HIF-1 that mediate metastasis and may  
222 be more amenable to therapeutic intervention, we performed microarray profiling using HIF-1 WT and KO  
223 PyMT cells cultured at normoxia or 6h of hypoxia. Several hundred differentially-expressed genes were  
224 identified for the following comparisons: 1) HIF-1 WT normoxia vs. HIF-1 WT hypoxia; 2) HIF-1 WT  
225 normoxia vs. HIF-1 KO normoxia; 3) HIF-1 WT hypoxia vs. HIF-1 KO hypoxia (refer to Supplementary  
226 Tables S1-S3, respectively). Several genes down-regulated in HIF-1 KO cells, including *Egln3* (Phd3),  
227 *aldolase C* (Aldoc), and *Pdk1*, are known HIF-1 $\alpha$  targets.

228  
229 The enzyme creatine kinase brain isoform (CKB) was one of the top HIF-dependent, but not  
230 hypoxia-dependent, differentially expressed genes. *Ckb* was down-regulated in normoxic HIF-1 KO cells  
231 by 13.4-fold ( $p=0.0093$ ) (Table S2). Following acute hypoxia exposure, *Ckb* expression in HIF-1 WT cells  
232 was 16.42-fold higher than in KO cells ( $p=0.0002$ ) (Table S3). However, *Ckb* was not differentially expressed

233 in HIF-1 WT cells between normoxic and hypoxic exposure (Table S1). Based on CKB's well-described role  
234 in regulating energy metabolism, and prior studies using creatine analogs to inhibit the creatine kinase  
235 pathway, including cyclocreatine (cCr) [32], we sought to determine if CKB plays a key role in mediating  
236 breast cancer metastasis. Microarray profiling was performed using HIF-1 WT and KO cells derived from  
237 the PyMT model, since 100% of mice will develop lung metastasis on the FVB/Nj strain [33]. Likewise,  
238 primary tumors regenerated from HIF-1 WT PyMT tumor cells develop lung metastasis with 100%  
239 penetrance [9].

240  
241 To validate *Ckb* expression changes, an independent set of PyMT HIF-1 WT and KO cells was  
242 exposed to normoxia or hypoxia. A significant decrease in *Ckb* mRNA expression was observed in  
243 normoxic HIF-1 KO cells compared to WT cells at either 6h or 24h of normoxia by qPCR, with a mean 7.44-  
244 fold decrease. At hypoxia, there was a more modest decrease in *Ckb* expression in the HIF-1 KO cells of  
245 ~1.7-fold (**Figure 1A**). We next investigated whether CKB is a direct HIF target in PyMT cells and in MCF-  
246 7 cells, which express CKB in an estrogen-responsive manner [34]. Two hypoxia-response elements (HREs)  
247 were identified in the murine *Ckb* or human *CKB* promoters (**Supplementary Figure S1A**). Chromatin  
248 immunoprecipitation (ChIP) assays were performed using PyMT HIF-1 WT and KO cells or MCF-7 cells  
249 modified to express pLKO.1-puro (empty vector, EV) or shRNA to HIF1A [35]. HIF-1 $\alpha$  was recruited to the  
250 -1326 and -1835 sites in PyMT WT cells (**Supplementary Figure S1B**), with an enrichment in HRE site  
251 occupancy of 11.5-fold or 4.6-fold, respectively. There was 1.8 fold enrichment of HIF-1 $\alpha$  at the -258 HRE  
252 site in MCF-7 EV cells relative to shHIF1A cells. However, no enrichment at the -935 site was observed  
253 (**Supplementary Figure S1C**). Therefore, HIF-1 directly regulates *CKB* mRNA expression in breast cancer  
254 cells, as reported for the colon [16]. Knockdown (KD) of *HIF1A* in MCF-7 cells significantly down-regulated  
255 *CKB* mRNA levels (**Supplementary Figure S1D**).

256  
257 CKB protein levels were also compared by western blotting. Exposure of HIF-1 WT PyMT cells to  
258 hypoxia for 24h did not induce CKB protein above normoxic (0h) levels (**Figure 1B**). Immunofluorescence  
259 also confirmed reduced CKB expression in HIF-1 KO PyMT cells (**Figure 1C**). CKB was localized to the  
260 cytoplasm in a perinuclear pattern, as well as to the nucleus. CKB association with the nuclear matrix has  
261 been reported in colon cancer cells [36]. CKB levels were then compared in PyMT HIF-1 WT and HIF-1 KO  
262 end-stage tumors [9]. A reduction in *Ckb* mRNA, normalized for epithelial content using keratin 18 (*Krt18*),  
263 (**Figure 1D**), and CKB protein in tumors was observed (**Figure 1E**). Of note, protein extracts were prepared  
264 from whole tumors, containing proteins expressed by tumor epithelial cells and the stroma, likely  
265 minimizing the total reduction in CKB since only the tumor epithelium lacks HIF-1 $\alpha$ .

### 266 267 **CKB levels are correlated with shortened regression-free survival**

268 The Cancer Genome Atlas (TCGA) database was queried to compare normalized *CKB* mRNA  
269 expression in breast cancer patients (**Figure 1F**). *CKB* is expressed in all subtypes, with enrichment in  
270 patients with HER2+ breast cancer relative to basal-like or luminal A subtypes. Comparing regression-free  
271 survival (RFS) using KMPlotter, high *CKB* mRNA expression correlated with a lower probability of RFS  
272 regardless of subtype (**Figure 1F**). In basal breast cancers, this hazard ratio increased (**Figure 1F**). Although  
273 limited breast cancer cases were available to query at the protein level, high levels of CKB also significantly  
274 correlated with reduced RFS (**Figure 1G**).

### 275 276 **Knockdown of *Ckb* impairs cell invasion**

277 To determine if CKB impacts metastasis to impact overall survival, we generated *Ckb* loss of  
278 function models in PyMT cells using shRNA-mediated gene knockdown (KD). Two independent shRNAs  
279 produced >70% gene KD (herein referred to as "sh59" and "sh61", **Supplementary Figure S2A**).  
280 Recombinant lentivirus particles produced for each shRNA construct were used to transduce HIF-1 WT

281 cells, resulting in >70% reduction of *Ckb* mRNA and CKB protein compared to either HIF-1 WT or empty  
282 vector (HIF-1 WT+ EV) transduced cells (**Figure 2A-B** and **Supplementary Figure 2A-2B**). By qPCR and  
283 western blotting, the sh61 *Ckb* KD pool showed the greatest reduction (**Figure 2A-B**). Deletion of *Ckb* did  
284 not affect HIF-1 $\alpha$  expression (**Supplementary Figure S2C**).

285  
286 To determine if loss of CKB, only one isoform of the four creatine kinases in the cell, impacted total  
287 creatine kinase (CK) enzymatic activity, CK activity (CK<sup>act</sup>) levels were compared in extracts from PyMT  
288 EV and *Ckb* KD cells. Measuring CK<sup>act</sup> is also important to predict sensitivity to cyclocreatine (cCr). Cells  
289 with very low CK<sup>act</sup> (0.01-0.05 U/mg protein) are resistant or refractory to cCr, whereas cells with high CK  
290 activity are cCr-responsive (>0.10 U/mg protein) [37,38]. Independent of oxygen tension, loss of CKB  
291 reduced CK<sup>act</sup> ~3-fold in sh59 and in sh61 KD cells (**Figure 2C**).

292  
293 Cell proliferation was compared at either normoxia or hypoxia. At normoxia, there was a slight  
294 decrease in growth rate in sh61 KD cells, beginning at 48h (**Figure 2D**). However, at hypoxia, cell  
295 proliferation was significantly decreased in sh61 KD cells only at 24h (**Figure 2E**). There were no significant  
296 changes in proliferation observed between EV and sh59 KD cells. Overall, deletion of *Ckb* had minor effects  
297 on PyMT cell proliferation, similar to observations for PyMT HIF-1 KO cells [9].

298  
299 We next compared breast cancer cell motility using the wound healing assay. There was no  
300 significant difference in wound closure between PyMT EV control cells and either sh59 or sh61 KD cells; in  
301 contrast, as expected, HIF-1 KO cells migrated significantly slower (**Figure 2F**). In contrast, invasion  
302 potential was significantly inhibited by *Ckb* KD at normoxia. Inhibition was more pronounced during  
303 hypoxia, with >10-20-fold reduction in invasion for shRNA KD cells relative to EV cells (**Figure 2G**).

304  
305 **Loss of CKB represses glycolysis and oxidative phosphorylation**

306 PyMT *Ckb* KD cells produced significantly less intracellular ATP than EV cells (**Figure 3A**).  
307 Metabolic activity was further characterized by Seahorse bioanalyzer assays. The extracellular acidification  
308 rate (ECAR), a measure of glycolytic activity, was reduced in either sh59 or sh61 KD cells (**Figure 3B-3D**).  
309 At the peak ECAR, glycolysis was repressed for each *Ckb* KD pool (**Figure 3C**), but only sh61 KD cells  
310 showed a reduction in glycolytic capacity (**Figure 3D**). Non-glycolytic acidification was also reduced in  
311 each KD pool (**Figure 3E**). These results are consistent with data from ovarian cancer cells that CKB is  
312 required for glycolysis [20]. In contrast, only the sh61 KD pool showed deficits in the oxygen consumption  
313 rate (OCR) (**Figures 3F-H**). Basal respiration levels and maximum respiration were reduced in the sh61 KD  
314 pool (**Fig. 3G-H**), although there was a non-significant trend in reduction for sh59 cells. ATP levels were  
315 significantly reduced in both shRNA KD pools (**Figure 3I**).

316  
317 **Ectopic CKB expression promotes, but cyclocreatine treatment represses, cell migration and invasion**

318 Mouse CKB (mCKB) was stably transfected into HIF-1 KO PyMT cells to determine if re-expression  
319 of CKB would rescue invasion. The percentage of cells invading through ECM increased when CKB was  
320 re-expressed (**Figure 4A**). CKB was also ectopically expressed in a highly invasive TNBC model, MDA-  
321 MB-231 cells, which do not express detectable levels of CKB protein by immunostaining (data not shown)  
322 or by immunoblotting (**Figure 7A**). After transient transfection, the percentage of invading cells increased  
323 almost 3-fold (**Figure 4B**), with similar results when mCKB was stably expressed (data not shown). Next,  
324 MDA-MB-231-NucLight Red (NR) cells, in which nuclei are labeled with a dye to allow for real-time  
325 imaging during chemotaxis, were transiently transfected with vector or +mCKB. Cells were exposed to  
326 reduced serum overnight (2% FBS) and then seeded into ClearView plates and attracted towards 10% FBS.  
327 Over-expression of mCKB in MDA-MB-231-NR cells dramatically increased chemotactic potential (**Figure**  
328 **4C**).



329 To test whether treatment with cyclocreatine (cCr) would mimic loss of CKB function, EV and sh61  
330 *Ckb* KD PyMT cells were treated with increasing concentrations of cCr for 96h and growth inhibition  
331 evaluated. We had expected to observe that cCr sensitivity would be reduced in *Ckb* KD cells, but, dose  
332 response curves were overlapping. The IC<sub>50</sub> value in EV and sh61 cells at 96h was 13.73 ± 4.33 mM and  
333 16.43 ± 2.98 mM, respectively (**Table 1**). Since 15 mM and 25 mM cCr doses were then used in short term  
334 biological assays (24-48h duration), we confirmed that these doses do not induce extensive cell death in EV  
335 or HIF-1 KO cells compared to vehicle treatment, although the basal level of cell death is higher in HIF-1  
336 KO cells (**Supplementary Figure S3A-B**).

337  
338 We tested cCr for anti-metastatic activity in a high-throughput wound assay. Either pre-treatment  
339 of PyMT EV cells with cCr prior to seeding, or adding cCr only after the scratch was applied inhibits wound  
340 healing (**Figure 4E**). The most potent repression occurred when cells were pre-treated with cCr 24h prior  
341 to wounding and then cCr was re-added during healing. However, cCr pre-treatment before wounding  
342 without adding cCr post-scratch also significantly delayed wound healing (**Figure 4E**). Exposure of EV cells  
343 to cCr also represses invasion through Matrigel (**Figure 4F**). Overall, small molecule inhibition of the CK  
344 pathway via cCr mimics loss of CKB function.

345  
346 The chemotherapeutic potential of cCr is also related to its ability to block cell cycle progression.  
347 Short-term treatment with cCr has reversible effects on the cell cycle, whereas long-term treatment leads to  
348 cell death [39]. EV cells treated with cCr accumulated in the G1 phase after 24h, with a corresponding  
349 reduction in the percentage of cells in the S-phase; these results were exacerbated at 48h (**Figure 4G**). In  
350 contrast, sh61 KD cells showed smaller increases in the G1 phase or decreases in the S-phase and the  
351 differences between 24h and 48h of cCr treatment were negligible (**Figure 4G**).

### 352 353 **Loss of *Ckb* suppresses tumor growth and inhibits lung metastases**

354 We compared growth of mammary tumors regenerated from orthotopic implantation of  
355 PyMT EV, HIF-1 KO, sh59 KD, and sh61 KD cells. In contrast to in vitro cell proliferation results, tumor  
356 growth rate was suppressed and was very similar between HIF-1 KO tumors and each *Ckb* shRNA pool  
357 (**Figure 5A**). There was no significant difference in tumor volume between each shRNA pool. At day 34  
358 post-transplant, the mean tumor volume of EV cells was ≥1000 mm<sup>3</sup>, whereas all other genotypes had  
359 reached a maximum volume of ~200 mm<sup>3</sup>. Decreases in tumor wet weight were similarly observed (**Figure**  
360 **5B**). To investigate if loss of *Ckb* in the tumor epithelium impacted overall survival, in an independent  
361 experiment, all tumors were grown until they could be resected at a similar volume, and animals were  
362 housed until moribund due to lung metastases. Animals previously bearing CKB+ EV tumors became  
363 moribund >3x faster than recipients of shRNA KD cells (HR= 3.681, **Figure 5C**). Tumor sections were then  
364 immunostained with antibodies to either Ki67, activated caspase-3 or CD31 and area positive for these  
365 markers quantified. Likely because PyMT EV tumors are highly necrotic, the percent positive area for Ki67+  
366 cells was higher in all of the smaller tumors ((HIF-1 KO, sh59, and sh61, **Figure 5D**). As expected, CD31  
367 levels were decreased in HIF-1 KO tumors relative to EV tumors, whereas a reduction in CD31 was only  
368 significant for sh61 KD tumors (**Figure 5E**). Approximately 9.8% of EV tumor area was apoptotic. In  
369 contrast, very low levels of apoptosis were observed for HIF-1 KO tumors (0.77%), and apoptosis was lower  
370 in shRNA KD tumors compared to EV tumors (**Figure 5F**).

### 371 372 **Either *Ckb* deletion, or systemic treatment with cyclocreatine, blocks lung metastasis**

373 To explore if *Ckb* knockdown blocks latter stages of the metastatic cascade, PyMT EV, sh59, or sh61  
374 KD cells were injected into the tail vein to generate lung metastases. Lungs of mice injected with EV cells  
375 were filled with large metastases visible to the naked eye, whereas no surface metastases were observed

376 for sh61 KD cells (**Figure 6A**). A strong repression of metastasis was observed for both shRNA *Ckb* KD  
377 pools, but there was no significant difference between the two pools (**Figure 6A**).  
378

379 Next, we determined if treatment with cCr inhibits lung colonization, or the growth of pre-  
380 established lung micro-metastases. PyMT EV cells were injected into the tail vein and allowed to seed the  
381 lungs for 24h. Mice then received daily treatment with cCr at a dose of 1 g/kg or vehicle (0.9% saline, IP)  
382 for 21 days. Whereas the surface of lungs from vehicle-treated mice was covered with metastases, very few  
383 metastases were visible in the cCr cohort (**Figure 6B**). The majority of mice treated with vehicle developed  
384 metastases (7/8, or 87.5%) and 5/8 mice (62.5%) treated with saline developed >100 lesions. In contrast, zero  
385 metastases were observed in 5/7 mice in the cCr cohort (71.4%) and 2 mice in each cohort developed fewer  
386 than 50 metastases ( $\chi^2$ ,  $p < 0.05$ ). These results were replicated in an independent experiment, and a third  
387 cohort was added in which administration of cCr therapy was delayed by 7 days, a time when lung micro-  
388 metastases have formed, such that therapy was then given for a total of 14 days. For mice treated with cCr  
389 beginning at day 1, the mean number of metastases was reduced by >10-fold. In contrast, approximately  
390 50% fewer metastases were detected if cCr therapy began on day 7 (**Figure 6C**). There were no detectable  
391 macro-metastases in the day 1 cCr cohort, versus 3.8 in the saline group or 1.4 in the day 7 cCr cohort  
392 (**Figure 6D**). Over the course of treatment, mice did not develop gross symptoms of toxicity and there was  
393 no significant difference in body weight whether animals were treated for either 14 (day 7 cCr) or 21  
394 consecutive days (day 1 cCr) (**Figure 6E**).  
395

#### 396 **Addition of cyclocreatine to paclitaxel or doxorubicin enhances growth inhibition**

397 In a broad panel of cancer cell lines, cCr repressed cell growth with similar efficacy as conventional  
398 agents, including cyclophosphamide, doxorubicin, or 5-FU [25,37,38,40]. Rat mammary adenocarcinoma  
399 tumor growth was enhanced when cCr (IV, IP) was paired with either cyclophosphamide, doxorubicin, or  
400 5-FU [25], or if the rats were fed chow supplemented with 1% cCr [41]. In pancreatic cancer and in myeloid  
401 leukemia, cCr monotherapy inhibits metastasis to distant organs [28,42]. Finally, in HER2+ trastuzumab-  
402 sensitive or -resistant breast cancer models, pairing cCr with trastuzumab represses cell growth via  
403 inhibition of CKMT1 [43]. Based on these observations, we sought to specifically determine in ER-negative  
404 breast cancer cell line models if cCr therapy was additive to, or synergistic with, paclitaxel (Taxol) or  
405 doxorubicin (DOX), two widely used agents to treat stage IV breast cancer, using a formal isobole testing  
406 method [44].  
407

408 First, we compared CKB expression levels in a panel of breast cancer cell lines representing various  
409 molecular subtypes (**Figure 7A** and **Supplemental Figure S4**). MDA-MB-231 and SUM-159 (TNBC) and  
410 T47D (ER+, luminal B) cells did not express detectable CKB levels, whereas expression was variable in the  
411 other cell lines. CKB protein was most abundant in MDA-MB-453 cells (TNBC), which also express low  
412 levels of HER2+ protein, although not above the clinical cutoff for designating HER2-amplification [45].  
413 CKB was moderately expressed in MDA-MB-468 and BT549 TNBC cells (**Figure 7A**), which expressed  
414 similar CKB levels as murine PyMT cells (**Figure 1B** and **Figure 7A**). AU565 (HER2+), CAMA1 (ER+,  
415 luminal B), HCC2157 (TNBC), and HCC70 (TNBC) also expressed moderate levels of CKB. MDA-MB-436  
416 (TNBC) cells expressed relatively low levels of CKB protein (**Supplemental Figure S4**).  
417

418 Three TNBC cell line models were selected for evaluation of efficacy of cCr monotherapy versus  
419 combination with paclitaxel or DOX, including, MDA-MB-468 (CKB moderate) BT549 (CKB moderate), and  
420 MDA-MB-453. (CKB high). BT549 cells also form invadopodia in vitro [46]. The estimated IC<sub>50</sub> doses of cCr  
421 and each chemotherapy were determined by phase confluence assays as described in the methods (**Table**  
422 **2**). Isobole assays evaluated whether combination therapy was likely to be additive or synergistic (**Table**  
423 **3**).

424 In MDA-MB-468 cells, a combination of 10 mM cCr with 25 nM Taxol was synergistic (combination  
425 index, CI=0.52), efficiently inhibiting cell growth (**Figure 7B**). For DOX, 100 nM repressed growth by ~50%,  
426 but the addition of cCr to DOX further inhibited cell growth (**Figure 7C**); this combination was additive. In  
427 contrast, in BT549 cells, cCr was synergistic with a 5 nM dose of Taxol (**Figure 7D**), but no significant change  
428 in cell growth was observed when cCr was paired with DOX; in fact, isobole studies suggested antagonistic  
429 effects of this combination (CI>1.0) (**Figure 7E, Table 3**). In MDA-MB-453 cells, the most sensitive model to  
430 cCr (**Table 2**), the combination of either Taxol (**Figure 7F**) or DOX (**Figure 7G**) with cCr was synergistic at  
431 the IC<sub>50</sub> doses of either agent (CI=0.95 and 0.77, respectively). It has been previously reported that  
432 combining cCr with Taxol enhances microtubule stability, leading to the synergistic killing of MCF-7 (ER-  
433 positive) cells [47]. To establish if this effect is also observed in ER-negative cells, MDA-MB-468 cells were  
434 immunostained for alpha-tubulin. Treatment with cCr slightly disrupted the microtubule network and  
435 Taxol stabilized microtubules, but the addition of cCr to Taxol further stabilized tubulin networks,  
436 indicating synergy between cCr and Taxol (**Supplementary Figure S5**). The molecular mechanisms of the  
437 observed additive effects of cCr in combination with DOX require further investigation.  
438

#### 439 **Invadopodia formation in TNBC cells depends on creatine kinase activity**

440 To determine if CKB regulates local invasion through the formation of invadopodia, two human  
441 TNBC models were used, MDA-MB-231 and BT549 cells. Invadopodia are characterized by focal  
442 degradation of a fluorescent gelatin coating deposited onto glass coverslips prior to cell seeding, in addition  
443 to the presence of cortactin [48]. We optimized protocols to image loss of gelatin by imaging invadopodia  
444 assay coverslips submerged into 24-well dishes using a live-cell imager (**Figure 7H**). Representative  
445 experiments of two independent, simultaneously imaged coverslips revealed that treatment of BT549 cells  
446 with cCr inhibited loss of gelatin over time (52h), whereas ectopic expression of CKB in MDA-MB-231 cells  
447 stimulated gelatin loss over 24h (**Figure 7H**). The presence of cortactin in areas of invadopodia formation  
448 was validated by immunofluorescence at the end of the imaging (**Figure 7I**; BT549 images in  
449 **Supplementary Figure S6A**). We also immunostained for CKB in endpoint invadopodia in MDA-MB-231  
450 +mCKB cells. Representative images comparing empty vector and +mCKB cells revealed CKB protein is  
451 detectable at the edges of invadopodia (**Supplementary Figure S6B**).  
452

453 **Discussion**

454

455 Although multiple roles for HIF-1 $\alpha$  in mediating breast cancer phenotypes are well-defined [49],  
456 many individual HIF-1 $\alpha$ -dependent genes remain to be characterized for their role in breast tumor  
457 progression and metastasis in specific breast cancer subtypes. We identified CKB as a HIF-1 $\alpha$ -dependent  
458 target gene necessary for tumor outgrowth and lung metastasis in the MMTV-PyMT transgenic model of  
459 MBC. Higher *CKB* mRNA or protein levels were also found to be prognostic of reduced relapse-free  
460 survival (RFS) across all molecular subtypes of breast cancer. The likelihood of RFS was further decreased  
461 for patients diagnosed with basal-like breast cancers. Since basal-like and HER2-enriched subtypes exhibit  
462 high constitutive expression of HIF-1 $\alpha$  and HIF-1 target genes [50,51], we focused on understanding the  
463 function of CKB in ER-negative models.

464

465 HIF-dependent, but not hypoxia stimulus-dependent, regulation of *Ckb* mRNA and protein levels  
466 was observed in PyMT cells. Since HIF protein stabilization can be induced independently of hypoxia by  
467 several growth factor signaling pathways, including EGF and HER2 [52], the HIF-1-dependent, but not  
468 hypoxia-induced, expression of CKB in TNBC may be mediated in this manner. Cell stressors such as low  
469 glucose, change in pH, and the production of reactive oxygen species (ROS) all increase HIF-1 $\alpha$  expression  
470 [53], and could up-regulate CKB expression independent of hypoxia. In contrast, in ER+ MCF-7 breast  
471 cancer cells, *CKB* mRNA levels increased in response to hypoxia. In both models, ChIP assays  
472 demonstrated that CKB is a direct HIF transcriptional target in the breast epithelium.

473

474 *CKB* mRNA and protein levels were also decreased in HIF-1 KO end-stage, whole tumors,  
475 although the reduction was modest relative to cultured cells. A significant difference in *Ckb* mRNA levels  
476 in tumors was observed only after normalization to the epithelial marker K18. Since HIF-1 loss, and  
477 therefore, reduced CKB, is targeted only to the tumor epithelium, a significant proportion of the CKB signal  
478 observed in whole tumor extracts is likely derived from the stroma. CKB is expressed in adipose,  
479 macrophages, and endothelial cells [29,54-56].

480

481 The biological activities predominantly impacted in response to *Ckb* shRNA KD were related to  
482 metastatic potential, including repression of invasion through extracellular matrix (ECM) and reduced lung  
483 metastasis. ATP production was also inhibited. Surprisingly, Seahorse analysis revealed decreases in both  
484 the glycolytic and mitochondrial respiration (OXPHOS) arms of cellular metabolism, with the most  
485 prominent changes observed for sh61 shRNA cells. Glycolytic capacity was reduced by 53%, basal  
486 respiration was reduced by 46% and maximal respiration was reduced by 55%. Further, the basal and  
487 maximum respiration rates of sh61 KD cells were similar (59.9 vs. 63.6 mpH/min/RFU), suggesting an  
488 inability to respond to increased demand for energy. We conclude that whereas either cellular proliferation  
489 or cell motility can tolerate decreased ATP production when CKB levels are low, the creatine kinase  
490 phosphagen arm is essential to produce the energy necessary for cell invasion and metastatic colonization.  
491 In other breast cancer cell types that regulate CKB in a hypoxia-dependent manner, like MCF-7 cells,  
492 increased CKB expression may be necessary to supplement energy production when oxygen is limiting  
493 and glycolysis is the predominant pathway to generate ATP. It has been suggested that cytosolic CKs  
494 interact with the mitochondrial CK isoforms to maintain energy flux [15]. In thermogenic brown fat, CKB  
495 directly shuttles between mitochondria and the cytoplasm, directly regulating mitochondrial ATP turnover  
496 [56]. CKB deletion in the presence of oxygen impaired energy production through glycolysis and  
497 mitochondrial respiration, similar to our observations in ER-negative breast cancers.

498

499 Despite minimal changes in proliferation *in vitro* in response to loss of CKB, there was a robust  
500 decrease in PyMT *Ckb* KD tumor growth rate. Remarkably, deletion of this single HIF-1 target gene

501 produced tumors with similar volumes to HIF-1 KO cells, suggesting that tumor cell-intrinsic CKB directly  
502 influences the local surrounding microenvironment to promote tumorigenesis. It is possible that loss of  
503 epithelial-derived CKB disrupts a paracrine network necessary to promote tumor growth. For example,  
504 local extracellular secretion of CKB by colon cancer cells into the liver microenvironment promotes  
505 metastatic outgrowth through extracellular production of phosphocreatine (PCr), which was then imported  
506 into tumor cells as an energy source [27]. In this model, implantation of an osmotic pump releasing cCr  
507 into peritoneum also repressed liver metastasis [27].  
508

509 Tail vein assays revealed a significant decrease in lung colonization either in response to *Ckb* KD  
510 or by inhibiting CK activity with daily cCr systemic treatment. cCr significantly inhibited formation of lung  
511 macro-metastases and the conversion of pre-established micro-metastases to macro-metastases. Because  
512 overall survival increases when *Ckb* is deleted in tumors re-generated from MTECs orthotopically  
513 implanted into the WT mammary fat pad, it is also clear that CKB is necessary for efficient completion of  
514 the entire metastatic cascade, beginning with local invasion. This conclusion is also supported by our  
515 observations that loss of CKB in PyMT cells impairs invasion whereas over-expression of CKB in MDA-  
516 MB-231 cells enhances not only chemotaxis and cell invasion, but also promotes invadopodia activity. The  
517 apparent relationship between HIF-1, a master regulator of cellular metabolism, and CKB, and the  
518 degradation of extracellular matrix by invadopodia is intriguing. In a proteomics screen to identify factors  
519 enriched in invadopodia, multiple HIF-dependent metabolic enzymes were identified, including GAPDH,  
520 enolase 1, lactate dehydrogenase (LDH), pyruvate kinase, muscle 2 (PKM2), and phosphoglycerate kinase  
521 1 (PGK1) [57]. Additional studies are warranted to ascertain how HIF-1 $\alpha$ -dependent modulation of CKB  
522 expression contributes to each step of the metastatic cascade. Of note, creatine supplementation, which  
523 increases creatine kinase flux, is not sufficient to change primary tumor growth rate, but significantly  
524 enhances lung metastasis [58]. Overall, tight regulation of cellular metabolism by CKs is likely critical for a  
525 cell's ability to invade.  
526

527 Local ATP generation coordinated by CKB to facilitate cell motility was previously suggested for  
528 astrocytes and fibroblasts [29]. The direct relationship of creatine flux to ATP levels and to cell motility was  
529 recently revealed using pancreatic cancer models [28]. In this study, CKB, but not other CK isoforms, was  
530 shown to be a Yes-associated protein (YAP)-responsive mechanosensory responder. In particular, YAP  
531 increased CKB expression and CK activity in response to a stiff extracellular environment. Increased  
532 expression of YAP promotes breast tumorigenesis, although it is dispensable for normal mammary gland  
533 development [59]. Connections between YAP and HIF and CKB are of interest since YAP can induce HIF-  
534 1 $\alpha$  [59] through mechanical loading [60], and since hypoxia/HIF-1 can also stimulate YAP activity through  
535 14-3-3-zeta [61], potentially setting up feed-forward loops executed via CKB that are necessary for  
536 metastatic potential.  
537

538 Cytotoxic chemotherapies are frontline treatments for stage IV TNBC. We observed that pairing  
539 cCr with either paclitaxel or doxorubicin enhanced cCr efficacy. The most potent inhibition of cell growth  
540 occurred when cCr was paired with paclitaxel. cCr treatment was also synergistic with DOX near the IC<sub>50</sub>  
541 of DOX in two TNBC cell lines (MDA-MB-468 and MDA-MB-453), but was antagonistic to cCr in BT549  
542 cells. Interestingly, doxorubicin can impact heart microtubule structure by impairing reassembly [62].  
543 Down-regulation of CKB in Skov3 ovarian cancer cells was shown to enhance sensitivity to doxorubicin  
544 [20]. However, the exact mechanisms of DOX synergy with cCr remain undefined. We conclude that cCr  
545 therapy inhibits growth and impairs chemotaxis/cell motility through both its effects on cellular  
546 metabolism and microtubule dynamics.  
547

548 There is increasing evidence from a variety of solid cancers that CK inhibition is a promising  
549 clinical intervention for patients with metastatic disease. In addition, cCr likely crosses the blood-brain  
550 barrier and phosphorylated-cCr functions as a phosphagen in the brain [63,64], suggesting that creatine  
551 analogs may effectively target brain metastases. Systemic cCr therapy is well-tolerated in rodents [65] and  
552 in limited clinical trials [15]. In addition, deletion of *Ckb* or systemic administration of cCr is protective  
553 against bone loss in mice [66], suggesting additional potential clinical applications to prevent osteolytic  
554 destruction of bone, the most common site of metastasis in breast cancer patients. A new generation  
555 derivative of cCr known as LUM-001 with enhanced bio-availability was developed to treat creatine  
556 transporter deficiency. LUM-001 was tested in rodents to treat neurodevelopmental cognitive disorders,  
557 including autism [63]. Clinical trials using LUM-001 are in enrollment ([www.clinicaltrials.gov](http://www.clinicaltrials.gov);  
558 NCT02931682) after pre-clinical studies were completed by the NIH Therapeutics for Rare and Neglected  
559 Diseases (TRND) program [67].

560

## 561 Conclusions

562 In summary, our results demonstrate that CKB is a major effector of HIF-1-mediated promotion of  
563 metastatic phenotypes in ER-negative breast cancer *in vitro* and *in vivo*. CKB is capable of driving aggressive  
564 phenotypes in the context of normoxia or hypoxia, likely through its combined roles in managing cellular  
565 metabolism, cell cycle progression and microtubule dynamics. A growing body of evidence indicates that  
566 cCr has anti-tumor efficacy in multiple breast cancer subtypes, including HER2+ breast cancers, and as  
567 reported herein, in ER-negative/basal breast cancer models. New clinical trials to explore cCr monotherapy  
568 versus combination with either Taxol or doxorubicin would be predicted to demonstrate prolonged  
569 survival through reduced survival of cancer cells into the circulation, during colonization, and by impairing  
570 the growth of cells already disseminated to distant organs, including lung, brain and bone metastases.

571

## 572 References

573

- 574 1. National Cancer Institute Surveillance, E., and End Results (SEER) Program. Cancer Stat Facts: Female Breast  
575 Cancer. Available online: <https://seer.cancer.gov/statfacts/html/breast.html> (accessed on August 16, 2021).
- 576 2. Bailey, K.M.; Wojtkowiak, J.W.; Hashim, A.I.; Gillies, R.J. Targeting the metabolic microenvironment of  
577 tumors. *Adv Pharmacol* **2012**, *65*, 63-107, doi:10.1016/B978-0-12-397927-8.00004-X.
- 578 3. Zhao, Y.; Butler, E.B.; Tan, M. Targeting cellular metabolism to improve cancer therapeutics. *Cell Death Dis*  
579 **2013**, *4*, e532, doi:10.1038/cddis.2013.60.
- 580 4. Dang, N.H.; Singla, A.K.; Mackay, E.M.; Jirik, F.R.; Weljie, A.M. Targeted Cancer Therapeutics: Biosynthetic  
581 and Energetic Pathways Characterized by Metabolomics and the Interplay with Key Cancer Regulatory Factors. *Curr*  
582 *Pharm Des* **2013**.
- 583 5. Semenza, G.L. HIF-1 mediates metabolic responses to intratumoral hypoxia and oncogenic mutations. *J Clin*  
584 *Invest* **2013**, *123*, 3664-3671, doi:10.1172/JCI67230.
- 585 6. Chiche, J.; Brahimi-Horn, M.C.; Pouyssegur, J. Tumour hypoxia induces a metabolic shift causing acidosis: a  
586 common feature in cancer. *J Cell Mol Med* **2010**, *14*, 771-794, doi:10.1111/j.1582-4934.2009.00994.x.
- 587 7. Rohwer, N.; Cramer, T. Hypoxia-mediated drug resistance: novel insights on the functional interaction of  
588 HIFs and cell death pathways. *Drug Resist Updat* **2011**, *14*, 191-201, doi:10.1016/j.drup.2011.03.001.
- 589 8. Brown, J.M. Exploiting the hypoxic cancer cell: mechanisms and therapeutic strategies. *Mol Med Today* **2000**,  
590 *6*, 157-162.
- 591 9. Schwab, L.P.; Peacock, D.L.; Majumdar, D.; Ingels, J.F.; Jensen, L.C.; Smith, K.D.; Cushing, R.C.; Seagroves,  
592 T.N. Hypoxia-inducible factor 1alpha promotes primary tumor growth and tumor-initiating cell activity in breast  
593 cancer. *Breast Cancer Res* **2012**, *14*, R6, doi:10.1186/bcr3087.
- 594 10. Xia, Y.; Choi, H.K.; Lee, K. Recent advances in hypoxia-inducible factor (HIF)-1 inhibitors. *Eur J Med Chem*  
595 **2012**, *49*, 24-40, doi:10.1016/j.ejmech.2012.01.033.
- 596 11. Doedens, A.; Johnson, R.S. Transgenic models to understand hypoxia-inducible factor function. *Methods*  
597 *Enzymol* **2007**, *435*, 87-105, doi:10.1016/S0076-6879(07)35005-2.

- 598 12. Keith, B.; Johnson, R.S.; Simon, M.C. HIF1alpha and HIF2alpha: sibling rivalry in hypoxic tumour growth and  
599 progression. *Nat Rev Cancer* **2012**, *12*, 9-22, doi:10.1038/nrc3183.
- 600 13. Wallimann, T.; Wyss, M.; Brdiczka, D.; Nicolay, K.; Eppenberger, H.M. Intracellular compartmentation,  
601 structure and function of creatine kinase isoenzymes in tissues with high and fluctuating energy demands: the  
602 'phosphocreatine circuit' for cellular energy homeostasis. *Biochem J* **1992**, *281* ( Pt 1), 21-40.
- 603 14. Wallimann, T.; Tokarska-Schlattner, M.; Schlattner, U. The creatine kinase system and pleiotropic effects of  
604 creatine. *Amino Acids* **2011**, *40*, 1271-1296, doi:10.1007/s00726-011-0877-3.
- 605 15. Wyss, M.; Kaddurah-Daouk, R. Creatine and creatinine metabolism. *Physiol Rev* **2000**, *80*, 1107-1213.
- 606 16. Glover, L.E.; Bowers, B.E.; Saeedi, B.; Ehrentraut, S.F.; Campbell, E.L.; Bayless, A.J.; Dobrinskikh, E.; Kendrick,  
607 A.A.; Kelly, C.J.; Burgess, A.; et al. Control of creatine metabolism by HIF is an endogenous mechanism of barrier  
608 regulation in colitis. *Proc Natl Acad Sci U S A* **2013**, *110*, 19820-19825, doi:10.1073/pnas.1302840110.
- 609 17. Streijger, F.; Oerlemans, F.; Ellenbroek, B.A.; Jost, C.R.; Wieringa, B.; Van der Zee, C.E. Structural and  
610 behavioural consequences of double deficiency for creatine kinases BCK and UbCKmit. *Behav Brain Res* **2005**, *157*, 219-  
611 234, doi:10.1016/j.bbr.2004.07.002.
- 612 18. Mooney, S.M.; Rajagopalan, K.; Williams, B.H.; Zeng, Y.; Christudass, C.S.; Li, Y.; Yin, B.; Kulkarni, P.;  
613 Getzenberg, R.H. Creatine kinase brain overexpression protects colorectal cells from various metabolic and non-  
614 metabolic stresses. *J Cell Biochem* **2011**, *112*, 1066-1075, doi:10.1002/jcb.23020.
- 615 19. Zarghami, N.; Giai, M.; Yu, H.; Roagna, R.; Ponzzone, R.; Katsaros, D.; Sismondi, P.; Diamandis, E.P. Creatine  
616 kinase BB isoenzyme levels in tumour cytosols and survival of breast cancer patients. *Br J Cancer* **1996**, *73*, 386-390.
- 617 20. Li, X.H.; Chen, X.J.; Ou, W.B.; Zhang, Q.; Lv, Z.R.; Zhan, Y.; Ma, L.; Huang, T.; Yan, Y.B.; Zhou, H.M.  
618 Knockdown of creatine kinase B inhibits ovarian cancer progression by decreasing glycolysis. *Int J Biochem Cell Biol*  
619 **2013**, *45*, 979-986, doi:10.1016/j.biocel.2013.02.003.
- 620 21. Chen, H.; Pimienta, G.; Gu, Y.; Sun, X.; Hu, J.; Kim, M.S.; Chaerkady, R.; Gucek, M.; Cole, R.N.; Sukumar, S.;  
621 et al. Proteomic characterization of Her2/neu-overexpressing breast cancer cells. *Proteomics* **2010**, *10*, 3800-3810,  
622 doi:10.1002/pmic.201000297.
- 623 22. Chen, W.Z.; Pang, B.; Yang, B.; Zhou, J.G.; Sun, Y.H. Differential proteome analysis of conditioned medium  
624 of BPH-1 and LNCaP cells. *Chin Med J (Engl)* **2011**, *124*, 3806-3809.
- 625 23. Xu, Y.; Cao, L.Q.; Jin, L.Y.; Chen, Z.C.; Zeng, G.Q.; Tang, C.E.; Li, G.Q.; Duan, C.J.; Peng, F.; Xiao, Z.Q.; et al.  
626 Quantitative proteomic study of human lung squamous carcinoma and normal bronchial epithelial acquired by laser  
627 capture microdissection. *J Biomed Biotechnol* **2012**, *2012*, 510418, doi:10.1155/2012/510418.
- 628 24. Zeng, G.Q.; Zhang, P.F.; Deng, X.; Yu, F.L.; Li, C.; Xu, Y.; Yi, H.; Li, M.Y.; Hu, R.; Zuo, J.H.; et al. Identification  
629 of candidate biomarkers for early detection of human lung squamous cell cancer by quantitative proteomics. *Mol Cell*  
630 *Proteomics* **2012**, *11*, M111 013946, doi:10.1074/mcp.M111.013946.
- 631 25. Teicher, B.A.; Menon, K.; Northey, D.; Liu, J.; Kufe, D.W.; Kaddurah-Daouk, R. Cyclocreatine in cancer  
632 chemotherapy. *Cancer Chemother Pharmacol* **1995**, *35*, 411-416, doi:10.1007/s002800050255.
- 633 26. Mulvaney, P.T.; Stracke, M.L.; Nam, S.W.; Woodhouse, E.; O'Keefe, M.; Clair, T.; Liotta, L.A.; Khaddurah-  
634 Daouk, R.; Schiffmann, E. Cyclocreatine inhibits stimulated motility in tumor cells possessing creatine kinase. *Int J*  
635 *Cancer* **1998**, *78*, 46-52.
- 636 27. Loo, J.M.; Scherl, A.; Nguyen, A.; Man, F.Y.; Weinberg, E.; Zeng, Z.; Saltz, L.; Paty, P.B.; Tavazoie, S.F.  
637 Extracellular metabolic energetics can promote cancer progression. *Cell* **2015**, *160*, 393-406,  
638 doi:10.1016/j.cell.2014.12.018.
- 639 28. Papalazarou, V.; Zhang, T.; Paul, N.R.; Juin, A.; Cantini, M.; Maddocks, O.D.K.; Salmeron-Sanchez, M.;  
640 Machesky, L.M. The creatine-phosphagen system is mechanoresponsive in pancreatic adenocarcinoma and fuels  
641 invasion and metastasis. *Nat Metab* **2020**, *2*, 62-80, doi:10.1038/s42255-019-0159-z.
- 642 29. Kuiper, J.W.; van Horsen, R.; Oerlemans, F.; Peters, W.; van Dommelen, M.M.; te Lindert, M.M.; ten Hagen,  
643 T.L.; Janssen, E.; Fransen, J.A.; Wieringa, B. Local ATP generation by brain-type creatine kinase (CK-B) facilitates cell  
644 motility. *PLoS One* **2009**, *4*, e5030, doi:10.1371/journal.pone.0005030.
- 645 30. van Horsen, R.; Janssen, E.; Peters, W.; van de Pasch, L.; Lindert, M.M.; van Dommelen, M.M.; Linssen, P.C.;  
646 Hagen, T.L.; Fransen, J.A.; Wieringa, B. Modulation of cell motility by spatial repositioning of enzymatic ATP/ADP  
647 exchange capacity. *J Biol Chem* **2009**, *284*, 1620-1627, doi:10.1074/jbc.M806974200.
- 648 31. Dent, R.; Hanna, W.M.; Trudeau, M.; Rawlinson, E.; Sun, P.; Narod, S.A. Pattern of metastatic spread in triple-  
649 negative breast cancer. *Breast Cancer Res Treat* **2009**, *115*, 423-428, doi:10.1007/s10549-008-0086-2.
- 650 32. Bergnes, G.; Yuan, W.; Khandekar, V.S.; O'Keefe, M.M.; Martin, K.J.; Teicher, B.A.; Kaddurah-Daouk, R.  
651 Creatine and phosphocreatine analogs: anticancer activity and enzymatic analysis. *Oncol Res* **1996**, *8*, 121-130.

- 652 33. Hunter, K.W.; Broman, K.W.; Voyer, T.L.; Lukes, L.; Cozma, D.; Debies, M.T.; Rouse, J.; Welch, D.R.  
653 Predisposition to efficient mammary tumor metastatic progression is linked to the breast cancer metastasis suppressor  
654 gene Brms1. *Cancer Res* **2001**, *61*, 8866-8872.
- 655 34. Wang, F.; Samudio, I.; Safe, S. Transcriptional activation of rat creatine kinase B by 17beta-estradiol in MCF-7  
656 cells involves an estrogen responsive element and GC-rich sites. *J Cell Biochem* **2001**, *84*, 156-172, doi:10.1002/jcb.1276.
- 657 35. Stiehl, D.P.; Bordoli, M.R.; Abreu-Rodriguez, I.; Wollenick, K.; Schraml, P.; Gradin, K.; Poellinger, L.;  
658 Kristiansen, G.; Wenger, R.H. Non-canonical HIF-2alpha function drives autonomous breast cancer cell growth via an  
659 AREG-EGFR/ErbB4 autocrine loop. *Oncogene* **2012**, *31*, 2283-2297, doi:10.1038/onc.2011.417.
- 660 36. Balasubramani, M.; Day, B.W.; Schoen, R.E.; Getzenberg, R.H. Altered expression and localization of creatine  
661 kinase B, heterogeneous nuclear ribonucleoprotein F, and high mobility group box 1 protein in the nuclear matrix  
662 associated with colon cancer. *Cancer Res* **2006**, *66*, 763-769, doi:10.1158/0008-5472.CAN-05-3771.
- 663 37. Lillie, J.W.; O'Keefe, M.; Valinski, H.; Hamlin, H.A., Jr.; Varban, M.L.; Kaddurah-Daouk, R. Cyclocreatine (1-  
664 carboxymethyl-2-iminoimidazolidine) inhibits growth of a broad spectrum of cancer cells derived from solid tumors.  
665 *Cancer Res* **1993**, *53*, 3172-3178.
- 666 38. Martin, K.; Winslow, E.; Okeefe, M.; Khandekar, V.; Hamlin, A.; Lillie, J.; Kaddurahdaouk, R. Specific  
667 targeting of tumor cells by the creatine analog cyclocreatine. *Int J Oncol* **1996**, *9*, 993-999, doi:10.3892/ijo.9.5.993.
- 668 39. Martin, K.J.; Winslow, E.R.; Kaddurah-Daouk, R. Cell cycle studies of cyclocreatine, a new anticancer agent.  
669 *Cancer Res* **1994**, *54*, 5160-5165.
- 670 40. Hoosein, N.M.; Martin, K.J.; Abdul, M.; Logothetis, C.J.; Kaddurah-Daouk, R. Antiproliferative effects of  
671 cyclocreatine on human prostatic carcinoma cells. *Anticancer Res* **1995**, *15*, 1339-1342.
- 672 41. Miller, E.E.; Evans, A.E.; Cohn, M. Inhibition of rate of tumor growth by creatine and cyclocreatine. *Proc Natl*  
673 *Acad Sci U S A* **1993**, *90*, 3304-3308, doi:10.1073/pnas.90.8.3304.
- 674 42. Fenouille, N.; Bassil, C.F.; Ben-Sahra, I.; Benajiba, L.; Alexe, G.; Ramos, A.; Pikman, Y.; Conway, A.S.; Burgess,  
675 M.R.; Li, Q.; et al. The creatine kinase pathway is a metabolic vulnerability in EVI1-positive acute myeloid leukemia.  
676 *Nat Med* **2017**, *23*, 301-313, doi:10.1038/nm.4283.
- 677 43. Kurmi, K.; Hitosugi, S.; Yu, J.; Boakye-Agyeman, F.; Wiese, E.K.; Larson, T.R.; Dai, Q.; Machida, Y.J.; Lou, Z.;  
678 Wang, L.; et al. Tyrosine Phosphorylation of Mitochondrial Creatine Kinase 1 Enhances a Druggable Tumor Energy  
679 Shuttle Pathway. *Cell Metab* **2018**, *28*, 833-847 e838, doi:10.1016/j.cmet.2018.08.008.
- 680 44. Tallarida, R.J. An overview of drug combination analysis with isobolograms. *J Pharmacol Exp Ther* **2006**, *319*,  
681 1-7, doi:10.1124/jpet.106.104117.
- 682 45. Vranic, S.; Gatalica, Z.; Wang, Z.Y. Update on the molecular profile of the MDA-MB-453 cell line as a model  
683 for apocrine breast carcinoma studies. *Oncol Lett* **2011**, *2*, 1131-1137, doi:10.3892/ol.2011.375.
- 684 46. Chevalier, C.; Cannet, A.; Descamps, S.; Sirvent, A.; Simon, V.; Roche, S.; Benistant, C. ABL tyrosine kinase  
685 inhibition variable effects on the invasive properties of different triple negative breast cancer cell lines. *PLoS One* **2015**,  
686 *10*, e0118854, doi:10.1371/journal.pone.0118854.
- 687 47. Martin, K.J.; Vassallo, C.D.; Teicher, B.A.; Kaddurah-Daouk, R. Microtubule stabilization and potentiation of  
688 taxol activity by the creatine analog cyclocreatine. *Anticancer Drugs* **1995**, *6*, 419-426, doi:10.1097/00001813-199506000-  
689 00009.
- 690 48. Martin, K.H.; Hayes, K.E.; Walk, E.L.; Ammer, A.G.; Markwell, S.M.; Weed, S.A. Quantitative measurement  
691 of invadopodia-mediated extracellular matrix proteolysis in single and multicellular contexts. *J Vis Exp* **2012**, e4119,  
692 doi:10.3791/4119.
- 693 49. de Heer, E.C.; Jalving, M.; Harris, A.L. HIFs, angiogenesis, and metabolism: elusive enemies in breast cancer.  
694 *J Clin Invest* **2020**, *130*, 5074-5087, doi:10.1172/JCI137552.
- 695 50. Gatza, M.L.; Kung, H.N.; Blackwell, K.L.; Dewhirst, M.W.; Marks, J.R.; Chi, J.T. Analysis of tumor  
696 environmental response and oncogenic pathway activation identifies distinct basal and luminal features in HER2-  
697 related breast tumor subtypes. *Breast Cancer Res* **2011**, *13*, R62, doi:10.1186/bcr2899.
- 698 51. Network, C.G.A. Comprehensive molecular portraits of human breast tumours. *Nature* **2012**, *490*, 61-70,  
699 doi:10.1038/nature11412.
- 700 52. Lee, J.W.; Bae, S.H.; Jeong, J.W.; Kim, S.H.; Kim, K.W. Hypoxia-inducible factor (HIF-1)alpha: its protein  
701 stability and biological functions. *Exp Mol Med* **2004**, *36*, 1-12, doi:10.1038/emm.2004.1.
- 702 53. Semenza, G.L. Targeting HIF-1 for cancer therapy. *Nat Rev Cancer* **2003**, *3*, 721-732, doi:10.1038/nrc1187.
- 703 54. Decking, U.K.; Alves, C.; Wallimann, T.; Wyss, M.; Schrader, J. Functional aspects of creatine kinase  
704 isoenzymes in endothelial cells. *Am J Physiol Cell Physiol* **2001**, *281*, C320-328, doi:10.1152/ajpcell.2001.281.1.C320.
- 705 55. Loike, J.D.; Kozler, V.F.; Silverstein, S.C. Creatine kinase expression and creatine phosphate accumulation are  
706 developmentally regulated during differentiation of mouse and human monocytes. *J Exp Med* **1984**, *159*, 746-757,  
707 doi:10.1084/jem.159.3.746.



- 708 56. Rahbani, J.F.; Roesler, A.; Hussain, M.F.; Samborska, B.; Dykstra, C.B.; Tsai, L.; Jedrychowski, M.P.; Vergnes,  
709 L.; Reue, K.; Spiegelman, B.M.; et al. Creatine kinase B controls futile creatine cycling in thermogenic fat. *Nature* **2021**,  
710 *590*, 480-485, doi:10.1038/s41586-021-03221-y.
- 711 57. Attanasio, F.; Caldieri, G.; Giacchetti, G.; van Horssen, R.; Wieringa, B.; Buccione, R. Novel invadopodia  
712 components revealed by differential proteomic analysis. *Eur J Cell Biol* **2011**, *90*, 115-127, doi:10.1016/j.ejcb.2010.05.004.
- 713 58. Zhang, L.; Zhu, Z.; Yan, H.; Wang, W.; Wu, Z.; Zhang, F.; Zhang, Q.; Shi, G.; Du, J.; Cai, H.; et al. Creatine  
714 promotes cancer metastasis through activation of Smad2/3. *Cell Metab* **2021**, *33*, 1111-1123 e1114,  
715 doi:10.1016/j.cmet.2021.03.009.
- 716 59. Chen, Q.; Zhang, N.; Gray, R.S.; Li, H.; Ewald, A.J.; Zahnow, C.A.; Pan, D. A temporal requirement for Hippo  
717 signaling in mammary gland differentiation, growth, and tumorigenesis. *Genes Dev* **2014**, *28*, 432-437,  
718 doi:10.1101/gad.233676.113.
- 719 60. Jing, X.; Yang, X.; Zhang, W.; Wang, S.; Cui, X.; Du, T.; Li, T. Mechanical loading induces HIF-1alpha  
720 expression in chondrocytes via YAP. *Biotechnol Lett* **2020**, *42*, 1645-1654, doi:10.1007/s10529-020-02910-4.
- 721 61. Jia, Y.; Li, H.Y.; Wang, J.; Wang, Y.; Zhang, P.; Ma, N.; Mo, S.J. Phosphorylation of 14-3-3zeta links YAP  
722 transcriptional activation to hypoxic glycolysis for tumorigenesis. *Oncogenesis* **2019**, *8*, 31, doi:10.1038/s41389-019-0143-  
723 1.
- 724 62. Rabkin, S.W.; Sunga, P. The effect of doxorubicin (adriamycin) on cytoplasmic microtubule system in cardiac  
725 cells. *J Mol Cell Cardiol* **1987**, *19*, 1073-1083, doi:10.1016/s0022-2828(87)80352-8.
- 726 63. Cacciante, F.; Gennaro, M.; Sagona, G.; Mazziotti, R.; Lupori, L.; Cerri, E.; Putignano, E.; Butt, M.; Do, M.T.;  
727 McKew, J.C.; et al. Cyclocreatine treatment ameliorates the cognitive, autistic and epileptic phenotype in a mouse  
728 model of Creatine Transporter Deficiency. *Sci Rep* **2020**, *10*, 18361, doi:10.1038/s41598-020-75436-4.
- 729 64. Uemura, T.; Ito, S.; Masuda, T.; Shimbo, H.; Goto, T.; Osaka, H.; Wada, T.; Couraud, P.O.; Ohtsuki, S.  
730 Cyclocreatine Transport by SLC6A8, the Creatine Transporter, in HEK293 Cells, a Human Blood-Brain Barrier Model  
731 Cell, and CCDSs Patient-Derived Fibroblasts. *Pharm Res* **2020**, *37*, 61, doi:10.1007/s11095-020-2779-0.
- 732 65. Kurosawa, Y.; Degrauw, T.J.; Lindquist, D.M.; Blanco, V.M.; Pyne-Geithman, G.J.; Daikoku, T.; Chambers, J.B.;  
733 Benoit, S.C.; Clark, J.F. Cyclocreatine treatment improves cognition in mice with creatine transporter deficiency. *J Clin*  
734 *Invest* **2012**, *122*, 2837-2846, doi:10.1172/JCI59373.
- 735 66. Chang, E.J.; Ha, J.; Oerlemans, F.; Lee, Y.J.; Lee, S.W.; Ryu, J.; Kim, H.J.; Lee, Y.; Kim, H.M.; Choi, J.Y.; et al.  
736 Brain-type creatine kinase has a crucial role in osteoclast-mediated bone resorption. *Nat Med* **2008**, *14*, 966-972,  
737 doi:10.1038/nm.1860.
- 738 67. (NCATS), N.N.C.f.A.T.S. LUM-001 as a treatment for creatine transporter deficiency. Available online:  
739 <https://ncats.nih.gov/trnd/projects/complete/cincy-creatine-transporter-defect> (accessed on August 19, 2021).
- 740 68. Brooks, D.L.; Seagroves, T.N. Chromatin Immunoprecipitation of HIF-alpha in Breast Tumor Cells Using Wild  
741 Type and Loss of Function Models. *Methods Mol Biol* **2018**, *1742*, 67-79, doi:10.1007/978-1-4939-7665-2\_7.
- 742 69. Seagroves, T.N.; Ryan, H.E.; Lu, H.; Wouters, B.G.; Knapp, M.; Thibault, P.; Laderoute, K.; Johnson, R.S.  
743 Transcription factor HIF-1 is a necessary mediator of the pasteur effect in mammalian cells. *Mol Cell Biol* **2001**, *21*, 3436-  
744 3444, doi:10.1128/MCB.21.10.3436-3444.2001.
- 745 70. Deng, S.; Krutilina, R.I.; Wang, Q.; Lin, Z.; Parke, D.N.; Playa, H.C.; Chen, H.; Miller, D.D.; Seagroves, T.N.;  
746 Li, W. An Orally Available Tubulin Inhibitor, VERU-111, Suppresses Triple-Negative Breast Cancer Tumor Growth  
747 and Metastasis and Bypasses Taxane Resistance. *Mol Cancer Ther* **2020**, *19*, 348-363, doi:10.1158/1535-7163.MCT-19-0536.
- 748
- 749

750 **Tables**

751

752 **Table 1. Cyclocreatine (cCr) IC<sub>50</sub> values in PyMT ER-negative cells.** IC<sub>50</sub> values ± SEM were determined  
 753 at 96h as described in the methods. IC<sub>50</sub> values for independent experiments were calculated using non-  
 754 linear regression and variable slope fit in Prism 9.0. Results from independent experiments were averaged  
 755 to report the mean (n=6, WT; n=6, HIF-1 KO; n= 4, EV; n=6, sh61).  
 756  
 757

| HIF-1 WT        | HIF-1 KO        | EV              | sh61 CKB KD     |
|-----------------|-----------------|-----------------|-----------------|
| 16.76 mM ± 4.47 | 15.44 mM ± 3.95 | 13.73 mM ± 4.33 | 16.43 mM ± 2.98 |

758

759

760

761 **Table 2: Calculation of monotherapy IC<sub>50</sub> values in human TNBC cell lines.** IC<sub>50</sub> values ± SEM were  
 762 determined at 96h as described in the methods. IC<sub>50</sub> values for independent experiments were calculated  
 763 using non-linear regression and variable slope fit in Prism 9.0. Results from independent experiments were  
 764 averaged to report the mean (n=4 replicates/cell line /drug).  
 765  
 766

| Cell Line  | cCr<br>IC <sub>50</sub> , mM | Taxol<br>IC <sub>50</sub> , nM | DOX<br>IC <sub>50</sub> , nM |
|------------|------------------------------|--------------------------------|------------------------------|
| MDA-MB-468 | 19.15 ± 3.06                 | 11.16 nM ± 2.94                | 343.6 ± 126.6                |
| BT549      | 22.38 ± 1.47                 | 3.82 ± 0.44                    | 28.28 ± 3.68                 |
| MDA-MB-453 | 6.10 ± 1.48                  | 6.03 ± 1.75                    | 60.39 ± 11.53                |

767

768

769 **Table 3: Combination indices calculated for human TNBC cell lines pairing cCr with either Taxol or**  
 770 **DOX.** Isobole studies were performed and data representative of 2 independent isobole assays are  
 771 shown.  
 772  
 773

| Cell Line  | Taxol @ IC <sub>50</sub><br>+ cCr @ IC <sub>30</sub><br>Combination Indices (CI) |                                | DOX @ IC <sub>50</sub><br>+ cCr @ IC <sub>30</sub><br>Combination Indices (CI) |                              |
|------------|----------------------------------------------------------------------------------|--------------------------------|--------------------------------------------------------------------------------|------------------------------|
|            | IC <sub>50</sub> , TAXOL<br>CI                                                   | IC <sub>70</sub> , TAXOL<br>CI | IC <sub>50</sub> , DOX<br>CI                                                   | IC <sub>70</sub> , DOX<br>CI |
| MDA-MB-468 | 1.06                                                                             | 0.52                           | 0.61                                                                           | 0.39                         |
| BT549      | 0.86                                                                             | 0.58                           | 1.50                                                                           | 1.28                         |
| MDA-MB-453 | 0.95                                                                             | 2.18                           | 0.77                                                                           | 1.40                         |

781 **Author Contributions:** R.I. Krutilina: Methodology development, investigation, writing, including review  
782 and editing. H.C. Playa: Methodology development, investigation, writing, including review and editing.  
783 The first two authors contributed equally and are listed in alphabetical order. D.L. Brooks:  
784 Conceptualization, methodology development, investigation, writing, including review and editing. L.P.  
785 Schwab: Methodology development, investigation, and writing-editing. D.N. Parke: Methodology  
786 development, investigation. D. Oluwalana: Investigation. D. Layman: Investigation. M. Fan and DL.  
787 Johnson: Investigation and resources related to data analysis and bioinformatics support. DJ. Yue:  
788 Generation of research materials and methodology. H. Smallwood: Methodology and investigation. T.N.  
789 Seagroves: Conceptualization, supervision, funding acquisition, investigation, writing-original draft, and  
790 writing-review and editing.

791  
792 **Funding:** This work was supported by NIH/NCI grant R01 CA138488 (to T.N. Seagroves), the Department  
793 of Defense Breast Cancer Research Program (BC150640 to T.N. Seagroves), the METAvivor foundation (to  
794 T.N. Seagroves), and an internal investigator bridge funding program from the UTHSC Office of Research.  
795 D. Layman was supported by a summer fellowship from the West Cancer Center (Memphis, TN) and D.  
796 Oluwalana, a graduate student in the UTHSC College of Graduate Health Sciences, was supported through  
797 the Department of Pathology. The contents of the article are solely the responsibility of the authors and do  
798 not necessarily represent the official views of the NIH/NCI or the DoD.

799  
800 **Institutional Review Board and IACUC Statement:** All studies were reviewed to be Not Human Subjects  
801 Research by the UTHSC Institutional Review Board (IRB); study ID, 0705002NHSR. All animal studies were  
802 consistent with U.S. Public Health Service policies and the Guide for the Care and Use of Laboratory  
803 Animals. Animal protocols were approved by the local UTHSC Institutional Animal Care and Use  
804 Committee (Study investigator: T. Seagroves).

805  
806 **Data Availability Statement:** Microarray data are publicly available through the Gene Expression  
807 Omnibus (GSE#183694, released September 10, 2021).

808  
809 **Acknowledgments:** We are grateful to the staff of the institutional core facilities at The University of  
810 Tennessee Health Science Center who supported this work, including Dr. William Taylor and Mr. Lorne  
811 Rose of the Molecular Resource Center (MRC). Dr. Deidre Daria assisted with cell cycle analysis at the  
812 FCCS Core, and Dr. Daniel Johnson provided optimized data analysis workflows and long-term data  
813 storage at the Molecular Bioinformatics (mBIO) core. All paraffin-embedded tissue sections were prepared  
814 by the Research Histology Core (RHC) with support from LaShawn Barnett. We thank the Department of  
815 Pathology and the Cancer Center at UTHSC for support to digitally scan all immunostained slides and for  
816 providing access to the 3D Histech analysis workstation and the Cancer Center for support of the IncuCyte  
817 S3 live-imaging system. The UTHSC Department of Pediatrics supports the Seahorse XF instrument  
818 managed by Dr. Heather Smallwood. We thank Dr. Athena Starland-Davenport and Dr. Rob Williams for  
819 providing access to the Nikon ECLIPSE Ti2 microscope.

820  
821 **Conflicts of Interest:** The authors declare no conflicts of interest.

822  
823

824 **Figure Legends**

825

826 **Figure 1. CKB expression in HIF-1 WT and KO PyMT cells and in end-stage tumors, and correlation to**

827 **prognosis in clinical datasets.** A. Scatter plot of the mean fold-change  $\pm$  SEM in *Ckb* mRNA levels relative

828 to HIF-1 WT cells at normoxia. Each data point represents an independent qPCR assay, and the grand mean

829 is shown. B. PyMT cells were grown to 80% confluence and subjected to hypoxic culture for either 6h or

830 24h, or cells were continuously cultured at normoxia, such that the 0h sample was harvested on the same

831 day as the 24h hypoxic sample. A representative western blot for CKB or  $\beta$ -tubulin (loading control) is

832 shown. C. Immunostaining for CKB (red) in HIF-1 WT and KO cells, counterstained with DAPI. Images

833 were captured at 630x magnification (scale bar indicates 20  $\mu$ m). D. *Ckb* mRNA levels were compared in

834 end-stage HIF-1 WT and KO tumors by qPCR. Data are expressed as the grand mean fold-change  $\pm$  SEM

835 between WT and KO tumors; the KO sample was set to a fold-change of 1.0 in each experiment. All data

836 were first normalized for epithelial content based on *Krt18* (n=3 tumors/genotype/experiment). E. Western

837 blotting for CKB comparing four independent tumors per HIF genotype (each harvested at similar

838 volumes). The top half of the blot was blotted for CKB and the lower portion was blotted for  $\beta$ -tubulin.

839 Blots were imaged on a LiCor Odyssey system and CKB expression was compared in HIF-1 WT versus KO

840 tumors after normalization to  $\beta$ -tubulin. The bar graph shows the normalized CKB intensity  $\pm$  SEM per

841 genotype. F. (Left) TCGA was queried for *CKB* mRNA expression levels among breast cancer subtypes as

842 defined by PAM50. Log<sub>2</sub>-normalized *CKB* expression is plotted, along with the 95% confidence interval and

843 standard deviation. (Right) KM Plotter was used to plot the probability of RFS when patients were stratified

844 by low or high expression of *CKB* mRNA levels (200884\_at); plots are shown for either all breast cancer

845 cases, or for basal breast cancer cases only. G. RFS is lower when *CKB* protein levels (P12277) are high. All

846 images were directly exported from the KM Plotter tool.

847

848 **Figure 2. Effect of *Ckb* knockdown in PyMT cells upon cell growth and invasion.** A. The mean fold

849 change  $\pm$  SEM in *Ckb* mRNA expression levels in HIF-1 KO cells and in shRNA KD pools (sh59 or sh61)

850 relative to empty vector (WT +EV) cells as measured by qPCR. Cells expressing the sh61 shRNA showed

851 the greatest reduction in *Ckb* mRNA levels. B. PyMT cells were grown to 80% confluence and subjected to

852 normoxic or hypoxia culture for 6h and immunoblotted for CKB or  $\beta$ -tubulin (loading control). Changes in

853 CKB protein are consistent with changes observed by qPCR, with sh61 KD cells showing the greatest

854 reduction of CKB expression. C. CK<sup>act</sup> was measured in whole cell extracts prepared from PyMT EV, sh59,

855 or sh61 cells cultured at normoxia or hypoxia (6h). Data shown are representative of three biological

856 replicate experiments. D-E. Growth curves of PyMT EV, sh59, or sh61 cells cultured at normoxia (D) or

857 hypoxia (E) in growth medium supplemented with 2% FBS. Cell proliferation was measured in replicate

858 plates at each time point (24, 48, 72, or 96h) using the WST-1 assay. For both oxygen tensions, the grand

859 mean of the percentage of proliferating cells relative to EV cells at t=0h  $\pm$  SEM is presented, calculated as

860 the average of mean cell number for n=3 technical replicates/time point/genotype as observed over three

861 biological replicate experiments. All data were analyzed by two-way ANOVA; N.S.= not significant. F.

862 PyMT EV, HIF-1 KO, sh59 KD, and sh61 KD cells were seeded into 6-well dishes such that they would be

863 100% confluent the next day. Following wounding, the percentage of open wound area in each field of view

864 was measured and expressed as a ratio per the total area of the field of view. Data were analyzed by two-

865 way ANOVA with a Bonferroni correction post-test. Data are representative of three biological replicate

866 experiments. G. The grand mean fold change in the invasion index after data were normalized to EV cells

867 cultured at normoxia (fold change set to 1.0; n=3 three independent biological replicate experiments). Data

868 were analyzed by ANOVA with a Bonferroni post-test.

869

870 **Figure 3. *Ckb* knockdown in PyMT cells reduces ATP levels and impairs both glycolysis and**

871 **mitochondrial respiration.** A. PyMT EV, sh59, and sh61 cells were plated in triplicate and grown to 80%

872 confluence prior to normoxic or hypoxic culture (24h). Cells were harvested, washed with ice-cold PBS,  
873 and immediately lysed on the plate for comparison of intracellular ATP levels by a bioluminescent assay,  
874 and data normalized to total DNA content. The mean ATP concentration (mM) per ng of DNA  $\pm$  SEM is  
875 shown (n=3 technical replicates per cell line/oxygen tension). The data shown are representative of three  
876 independent biological replicates. B-I. PyMT EV, sh59 *Ckb* KD, and sh61 *Ckb* KD cells were profiled for  
877 metabolic activity using Seahorse bioanalyzer assays (Glycolysis Stress or Mito Stress test kits) to measure  
878 changes in parameters associated with either ECAR, panels B-E, or with mitochondrial respiration (OCR,  
879 panels F-I). The black arrows (B, F) indicate when injections occurred during the assays. Changes were  
880 observed in ECAR plotted over time (B), peak glycolysis (C), glycolytic capacity (D), non-glycolytic  
881 acidification (E), OCR over time (F), basal respiration (G), maximum respiration (H), and ATP-linked  
882 respiration (I) in sh61 *Ckb* KD cells. For some of the measured outputs, there were also significant changes  
883 observed in sh59 *Ckb* KD cells. Panels B and F are representative of three independent experiments. For  
884 panels C-E and G-I, the bar graphs represent the grand mean of three independent experiment means  
885 across n=6 technical well replicates/genotype/experiment. Each genotype of cells was randomly plated in  
886 different patterns during each independent experiment to minimize any potential effects of plate well  
887 location on measurements.  
888

889 **Figure 4. Ectopic expression of CKB in HIF-1 KO PyMT cells or in human MDA-MB-231 TNBC cells**  
890 **enhances cell invasion, but cCr treatment represses wound healing, invasion, and cell cycle progression.**

891 A. The percentage of invading cells was compared between PyMT HIF-1 KO + vector control (+ vec) and  
892 PyMT HIF-1 KO + mCKB (+CKB) cells over three biological experiments; the grand mean  $\pm$  SEM is shown.  
893 The insert shows CKB expression by western blotting relative to total PARP (loading control). B. The  
894 percentage of invading cells in MDA-MB-231 TNBC cells transfected with vector alone (+ vector) or with  
895 mCKB (+ mCKB); cells were plated for invasion assays 72h post-transfection, when CKB levels were  
896 maximally expressed (western blot insert,  $\beta$ -tubulin as a loading control). C. Chemotaxis assays were  
897 performed in transiently transfected MDA-MB-231-NR cells using IncuCyte ClearView plates. The mean  
898 percentage of migrated cells/total cells seeded was compared between genotypes over time during  
899 chemoattraction to 10% FBS. Data are representative of two independent experiments. D. Cells were  
900 exposed to increasing doses of cCr as described in the methods and imaged for 96h. Percent growth  
901 inhibition was set relative to vehicle control and then plotted vs. log of the molar concentration and fit with  
902 a nonlinear regression curve analysis. The graph is representative of at least 3 independent biological  
903 replicates. E. PyMT EV cells were plated onto ImageLock plates. Then, cells were either pre-treated with  
904 cCr prior to wounding and cCr added post-wounding, cells were pre-treated with cCr prior to wounding,  
905 but cCr removed post-wounding, or fresh media with cCr was added only after wounding. Data are  
906 representative of at least two biological replicates. F. PyMT EV cells were seeded in an invasion assay in  
907 which cells in the upper chamber were exposed to either vehicle or to 25 mM cCr and then cultured for 48  
908 h. G. PyMT EV or sh61 cells were treated with 25 mM cCr for either 24h or 48h and cell cycle analysis was  
909 performed by PI staining to assay for changes in cell cycle progression. The mean  $\pm$  SEM is shown for each  
910 phase of the cell cycle (n=3 technical replicates/genotype/time point). Data are representative of three  
911 independent experiments.  
912

913 **Figure 5. Tumor cell-intrinsic CKB promotes PyMT primary tumor growth and lung metastasis *in vivo***  
914 **and deletion of CKB in the tumor epithelium improves overall survival.**

915 A. Growth rate over time after transplantation of PyMT EV, HIF-1 KO, sh59 KD, and sh61 KD cells into the inguinal mammary fat pad of  
916 female FVB/Nj recipients. Mean tumor volume  $\pm$  SEM is shown. B. All tumors harvested at day 34 from  
917 panel A were weighed to determine the mean wet weight (g)  $\pm$  SEM at experiment endpoint. Data in A-B  
918 are representative of two independent experiments. C. The impact of CKB expression in the PyMT tumor  
919 epithelium on the survival of recipients following tumor resection. Mice implanted with PyMT cells (EV or

920 either shRNA KD construct) were subjected to primary tumor resection after tumors grew to similar  
921 volumes (~500 mm<sup>3</sup>) and mice allowed to survive post-resection until moribund due to lung metastasis.  
922 Mice were removed from the study when panting due to lung metastasis, or if bodyweight decreased by  
923 >15%. The morbidity hazard ratio (HR) is 3.68 times higher when FVB/Nj recipients bear *Ckb* WT tumors  
924 (n=3 mice for EV and n=7 total mice for *Ckb* shRNA knockdown, representing either sh59 KD or sh61 KD  
925 tumors). D-F Immunostaining of PyMT EV (n=5 tumors), HIF-1 KO (n=4 tumors), sh59 KD (n=4 tumors) or  
926 sh61 KD (n=5 tumors) sections to enumerate Ki67 (D), CD31 (E) or activated-caspase 3 (F). The mean ± SEM  
927 of the percentage (%) of the positive area of whole tumor sections is reported for each genotype.  
928

929 **Figure 6. Knockdown of *Ckb* in the PyMT tumor epithelium or systemic cCr therapy decreases lung**  
930 **metastasis burden.** A. PyMT EV, sh59 KD, or sh61 KD cells were injected into the tail vein of female FVB/Nj  
931 recipients. After 21 days, mice were euthanized and lungs harvested for metastasis evaluation after lung  
932 inflation through the trachea with PBS. The number of metastases was compared across genotypes; the  
933 scatter plot shows the burden of individual lungs with the mean ± SEM shown. Corresponding H&E--  
934 stained images of lungs representative of the genotype mean are shown (400x magnification). Data are  
935 representative of two independent experiments. B. EV PyMT cells were injected into the tail vein of female  
936 FVB/Nj recipients. The next day, treatment with either vehicle (saline, IP, daily) or cCr (1g/kg in saline, IP,  
937 daily) was initiated. After 21 days, the mice were euthanized and lungs harvested after inflation with PBS.  
938 The total number of surface metastases was counted under a dissecting scope. A majority of the mice  
939 treated with cCr (5 of 7) did not develop detectable metastases, whereas 2 mice in each cohort (2/8, saline  
940 and 2/7, cCr) developed fewer than 50 metastases. Only in the saline group did the majority of mice develop  
941 metastases throughout the lung, with >100 lesions present (5/8 mice;  $\chi^2= 7.634$ ,  $p=0.022$ ). Images of whole  
942 lungs photographed immediately post-dissection are shown. C-D. Comparison of total metastases present  
943 per lung (C), or the number of macro-metastases per lung (D) when mice are treated with vehicle, or when  
944 cCr is administered at either day 1 (Day 1 cCr) or when cCr therapy begins at day 7 post-tail vein injection  
945 (Day 7 cCr). All lungs were harvested at day 21 post-injection. E. The mean bodyweight of the mice treated  
946 with saline (vehicle) or cCr from panels C-D.  
947

948 **Figure 7. Cyclocreatine is synergistic with, or additive to, two conventional chemotherapies, and**  
949 **cyclocreatine inhibits the formation of invadopodia.** A. (Left) Western blotting for endogenous CKB  
950 protein in a panel of human breast cancer cell lines ( $\beta$ -tubulin, loading control). (Right) Western blotting for  
951 CKB protein in BT549 TNBC cells and HIF-1 WT PyMT cells in a separate blot. BT549 cells express similar  
952 levels of CKB protein as PyMT HIF-1 WT cells; equivalent loading is indicated by Ponceau S staining. B-G.  
953 The growth ratio (all treatments are normalized to their respective t=0 cell density) over time when human  
954 MDA-MB-468 TNBC cells (B-C), BT549 TNBC cells (D-E), or MDA-MB-453 TNBC cells (F-G) are cultured  
955 in the presence of vehicle, cCr alone, or cCr with Taxol (B, D, F) or doxorubicin (C, E, G), for 96h. H. Loss  
956 of Oregon Green-conjugated gelatin was measured in the IncuCyte S3 live-cell imager after seeding cells  
957 onto gelatin-coated coverslips in the presence of an MMP inhibitor, and then replacement of growth  
958 medium with or without cCr as described in the methods. Quantification data over time is shown for  
959 vehicle-treated versus cCr-treated BT549 cells (H, left panel) or for MDA-MB-231 empty vector (EV) or  
960 MDA-MB-231 +mCKB cells (H, right panel). Two coverslips were measured simultaneously at each time  
961 point across each coverslip/well (n=16 independent images/coverslip/timepoint). Data are representative  
962 of three independent experiments. I. Example immunostaining images of invadopodia at experimental  
963 endpoint co-stained with cortactin (red) and DAPI (630x magnification, scale bar represents 20  $\mu$ M). All  
964 images were captured with identical laser intensity and exposure settings.  
965  
966

967 **Supplementary Materials and Methods**

968

969 **Chemicals**

970 Cyclocreatine (cCr) and doxorubicin was purchased from either Sigma-Aldrich (#377627, or #D1515; 98%  
971 purity) or Cayman Chemical Company (cat# 20649, Ann Arbor, MI, >95% purity), and paclitaxel (>99.5%  
972 purity) was purchased from LC Laboratories (cat.# P-9600, Woburn, MA). cCr stock was freshly diluted to  
973 50 mM in complete growth medium immediately before use. Paclitaxel (Taxol) and doxorubicin (DOX)  
974 were prepared in DMSO as 20 mM and 5  $\mu$ M stocks, respectively, and stored at -20°C; thawed stocks were  
975 serially diluted in DMSO to prepare working stocks for *in vitro* assays. For use *in vivo*, cCr was dissolved  
976 to ~1.92 mg/mL into sterile 0.9% saline using gentle heat, sterile filtered, and at -20°C. Prior to treatment,  
977 the frozen aliquot was heated to ~50°C, transferred to a sterile glass evacuated vial, and stored protected  
978 from light in a thermos heated to 37°C. cCr was immediately injected into mice (IP) at a final dose of 1.0  
979 g/kg/day.

980

981 **RNA preparation and harvest for microarray profiling**

982 HIF-1 WT and KO PyMT cells grown in DMEM/F12 medium (n=6 wells/genotype) supplemented with 2%  
983 FBS and 15 mM HEPES. At ~80% confluence, plates were left at normoxia or transferred to hypoxia (0.5%  
984 O<sub>2</sub>) for 6h, when HIF-1 transcriptional activity peaks [1]. At harvest, individual wells were washed with  
985 cold PBS, scraped, and cells pelleted and flash frozen. Total RNA was prepared from partially thawed cell  
986 pellets using RNABee reagent (Tel-Test, Friendswood, TX). Independent replicate total RNA samples (n=3)  
987 were hybridized to the MouseRef-6v1.1 Expression BeadChip Kit (Illumina, San Diego, CA) at the UTHSC  
988 Molecular Resource Center of Excellence (MRC). Supplementary Tables S1-S3 include differentially-  
989 expressed gene lists from the following comparisons, respectively: Table S1: HIF-1 WT @normoxia vs. HIF-  
990 1 WT @hypoxia, Table S2: HIF-1 WT vs. HIF-1 KO, @normoxia and Table S3: HIF-1 WT vs. HIF-1 KO,  
991 @hypoxia.

992

993 **Real-time quantitative PCR (qPCR)**

994 Total RNA isolated using the RNABee reagent was converted to cDNA using the High-Capacity cDNA  
995 Reverse Transcription Kit (Applied Biosystems, Waltham, MA). qPCR was performed on the Roche LC480  
996 instrument using default cycling parameters. Crossing point (Cp) values were normalized based on the  
997 expression of the integrator complex subunit 3 (*Ints3*) for mouse genes or cyclophilin A (*PPIA*) for human  
998 genes. To compensate for any changes in epithelial content in total RNA extracted from whole tumors,  
999 since only the tumor epithelium is deleted for *Hif1a*, *Ints3*-normalized Cp values were also normalized to  
1000 *Krt18* (K18).

1001

1002 **Immunofluorescence staining**

1003 Cells were cultured to sub-confluence in multi-well chamber slides (ibidi, Gräfelfing, Germany). At harvest,  
1004 cells were washed with cold PBS and fixed with 4% paraformaldehyde/PBS before permeabilization with  
1005 0.1% Triton-X, washing in PBS + Tween-20 (PBST), and blocking with buffer containing both BSA and  
1006 normal serum. Primary antibodies to CKB, cortactin, or alpha-tubulin were incubated at 4°C overnight in  
1007 blocking buffer. Cortactin and tubulin were detected with anti-IgG secondary antibodies for 1h at RT (either  
1008 AlexaFluor-488, or -594, Life Technologies). Tertiary amplification was used to detect CKB; after primary  
1009 antibody, cells were incubated with donkey anti-rabbit-biotin-X-IgG secondary antibody (cat. #A16027, Life  
1010 Technologies, 1;400), washed, and then incubated with Alexa-Fluor-594-conjugated streptavidin. Prior to  
1011 mounting, cells were counterstained with DAPI, washed and then ibidi mounting medium was added.

1012

1013

1014

1015 **Protein extraction and western blotting**

1016 Whole cell extracts (WCE) and high-salt enriched WCE (HS-WCE) fractions were prepared as in [1]. To  
1017 detect HIF-1 $\alpha$ , HS-WCE (5  $\mu$ g) was resolved on 3-8% Tris-Acetate gels. For CKB, WCE (20-40  $\mu$ g input)  
1018 were resolved on either 4-12% Tris-Bis or 10% Tris-Bis BOLT gels (Life Technologies) and transferred onto  
1019 PVDF Fluorescent (PVDF-FL) membrane (Millipore, Burlington, MA). To confirm equivalent loading,  
1020 membranes were immunostained with antibodies as described in the figure legends or were stained prior  
1021 to blotting with Ponceau S (Sigma, St. Louis, MO) and scanned. Ponceau S-stained membranes were de-  
1022 stained prior to blocking with either 5% non-fat dry milk (NFDN)/TBST for enhanced chemiluminescence  
1023 (ECL) or with Odyssey blocking buffer (LiCor Biosciences) for near-infrared (NIR) detection. Membranes  
1024 were probed with primary antibodies followed by extensive washing and incubation with anti-rabbit  
1025 whole IgG secondary antibodies conjugated to either HRP (Jackson Immunologicals, West Grove, PA) or  
1026 to NIR fluorophores (LiCor Biosciences, Lincoln, NE). Antibody complexes were detected by ECL and  
1027 membranes exposed to film, or membranes were directly imaged using the LiCor Odyssey or Azure  
1028 Sapphire NIR imaging systems. In some cases, membranes were stripped with ReBlot Plus Mild (Millipore),  
1029 then re-blocked and incubated with antibodies to  $\beta$ -tubulin or PARP. Alternatively, .tiff images of Ponceau-  
1030 S-stained membranes were analyzed by ImageStudio densitometry analysis (LiCor Biosystems) to  
1031 agnostically quantitate whole lane signal.

1032

1033 **Patient database mining**

1034 Datasets were analyzed using The Cancer Genome Atlas (TCGA) database [2] and Kaplan-Meier  
1035 (KM)Plotter [3]. The level of *CKB* mRNA expression in breast tumor subtypes was derived from the TCGA  
1036 data portal (<http://cancergenome.nih.gov/>). Level three normalized data derived from Illumina RNASeqv2  
1037 data compared mRNA expression, and samples were stratified by tumor subtype based on the PAM50  
1038 method (last accessed October 4, 2016). Plots with  $p$ -values  $\leq 0.05$  (ANOVA with Bonferroni correction)  
1039 were considered significant. For regression-free survival (RFS) analysis, KMPlotter was stratified by CKB  
1040 (200884\_at) mRNA or protein (P12277) expression in breast cancer patients (last accessed February 3, 2021).

1041

1042 **Promoter analysis and Chromatin immunoprecipitation (ChIP) assays**

1043 The mouse and human *CKB* proximal promoters (-2000 to +500 bp) were scanned for putative functional  
1044 hypoxic response elements (HREs) using the Transcription Factor Matrix (TFM) Explorer algorithm and  
1045 weight matrices available from JASPER and TRANSFAC. PyMT HIF-1 WT and KO cells and MCF7 EV  
1046 (pLKO.1-puro) or shHIF1A transduced cells described in [4] were cultured at normoxia or 0.5% O<sub>2</sub>  
1047 (hypoxia) for 6-24h and fixed with 1% formaldehyde for 12min. Positive controls included a previously  
1048 validated functional HRE in the *Vegf* promoter for PyMT cells [5] and a previously validated functional  
1049 HRE identified in the *EPO* promoter [6] for MCF-7 cells.

1050

1051 **PyMT Ckb shRNA knockdown (KD) cell lines**

1052 PyMT HIF-1 WT cells were used to create *Ckb* stable shRNA knockdown (KD) via lentiviral transduction.  
1053 First, a *Ckb* shRNA library containing 3 independent *Ckb* targeting sequences individually cloned into the  
1054 pLKO.1-puro vector was purchased from Open Biosystems (clone IDs: TRCN0000024659, "sh59",  
1055 TRCN0000026460, "sh60" and TRCN0000024661, "sh61"; Supplementary Table S7). Cells (1x10<sup>6</sup>) were  
1056 transfected with each shRNA plasmid (4  $\mu$ g) by nucleofection with kit T and program setting 24  
1057 (Nucleofector, Lonza). Lentivirus particles for pLKO.1-empty (empty vector, EV), and the pLKO.1-puro  
1058 sh59 and sh61 constructs were produced by Dr. Junming Yue of the UTHSC Viral Vector Core. PyMT cells  
1059 were transduced with lentivirus particles (MOI=50). Puromycin (2  $\mu$ g/mL) was added 72h later and a  
1060 "pool" of surviving clones (representing several hundred colonies) was established for each shRNA. Stably  
1061 transduced lines were maintained in growth media plus 1  $\mu$ g/mL puromycin; antibiotic selection was  
1062 removed from cells at least 4 days before biological assays or treatments with cCr.



1063 **Human breast cancer cell lines, mycoplasma testing and cell line authentication**

1064 All cells were obtained from the Fan laboratory at UTHSC via the American Type Culture Collection  
1065 (ATCC) and grown in base media (DMEM-Hi: MDA-MB-231 and MDA-MB-453 cells, DMEM/F-12: MDA-  
1066 MB-468 cells or RPMI: BT549 cells) supplemented with 10% FBS (cat.# FB-01, Omega Scientific, Tarzana,  
1067 CA). All cells were authenticated at the University of Arizona Genetics Core. Cells were routinely screened  
1068 for mycoplasma using the Lonza MycoAlert kit.

1069

1070 **PyMT cell proliferation assay by WST-1**

1071 Cells were grown at normoxia or hypoxia in medium buffered with 15 mM HEPES. The day before  
1072 enumeration, 20,000 cells were plated into 96-well plates in normal growth medium (n=3  
1073 wells/genotype/oxygen tension/time point). The medium was changed 24h post-plating, when the first cell  
1074 harvest was collected (t=0h time point), but medium was not replenished for the duration of the  
1075 experiment. Background absorbance was subtracted and raw data normalized to the EV controls (%  
1076 maximal proliferation vs. EV). To generate a cCr dose-response curve, at 24h post-seeding, growth media  
1077 without drug or with media containing increasing doses of cCr (from 2 mM to 50 mM) was replaced. Cells  
1078 were incubated for 96h and then analyzed by the WST-1 assay (Chemicon, cat.#2210, Burlington, MA).  
1079 Growth inhibition was measured as the change in absorbance over time, normalized to the vehicle control  
1080 for each cell line (set to 100%).

1081

1082 **Wound healing assays**

1083 PyMT EV, HIF-1 KO, and *Ckb* KD cells were plated in 12-well plates in growth medium (30,000 cells/well;  
1084 n=3 wells per genotype) and grown to 100% confluence. A scratch with a 1 mL tip in a vertical and  
1085 horizontal direction was applied to each well. Cells were washed to remove the detached cells and fresh  
1086 growth medium added (t=0h). Images were captured at 100x magnification at 0, 8, 24, 32, 48, 56, and 72h  
1087 and analyzed for open wound area/total area using ImageJ. Additional wound healing assays were  
1088 performed using the IncuCyte S3 live-cell imaging system. PyMT EV cells were pre-incubated for 24h with  
1089 25 mM cCr in growth media supplemented with 2% FBS. Cells were plated into 96-well format Image Lock  
1090 microplates (Sartorius, Göttingen, Germany) at 40,000/cells/well (n=8 technical replicates/condition) such  
1091 that cells would be 100% confluent approximately 24h later. The WoundMaker tool created a uniform 700-  
1092  $\mu$ M scratch/well, the wounds were washed and growth medium containing either vehicle or 25 mM cCr  
1093 was applied. Wounded EV cells that were not pre-treated with cCr were exposed to vehicle or to cCr (25  
1094 mM). Raw data were analyzed using the total wound area algorithm and exported into Prism 9.0.

1095

1096 **Invasion assays**

1097 PyMT EV, HIF-1 KO, and *Ckb* KD cells were first gradually weaned from growth medium supplemented  
1098 with 2% FBS to 0.5% FBS as in [1]. Cells were then cultured 18h in serum-free DMEM/F-12 medium. The  
1099 next day, 25,000 cells were plated onto control inserts or Matrigel-coated transwell inserts (BD Biosciences,  
1100 San Jose, CA) and attracted to wells containing DMEM/F12 medium supplemented with 5% FBS (n=3  
1101 wells/genotype). The mean cell invasion index corrected for random migration was calculated at 48h post-  
1102 seeding. To determine if re-expression of CKB in HIF-1 KO PyMT cells would rescue invasion, vector  
1103 control, or HIF-1 KO cells stably transfected to express mCKB were gradually weaned to 0.5% FBS and then  
1104 plated at a density of 40,000 cells into transwell inserts (with and without coating with Matrigel) and  
1105 attracted to 5% FBS for 48h. MDA-MB-231 transiently transfected cells (empty vector or +mCKB) were  
1106 serum-starved overnight before plating onto transwell inserts and then attracted to medium supplemented  
1107 with 10% FBS for 24h. For studies comparing normoxia to hypoxia, changes in PyMT cell invasion are  
1108 expressed as the fold change relative to the invasion index observed for HIF-1 WT cells cultured at  
1109 normoxia (fold change = 1.0). Otherwise, all other data are expressed as the % of invading cells (invading  
1110 cells/total cells plated).

1111 **Intracellular ATP Assay**

1112 Intracellular ATP levels were compared using the high sensitivity ATP Bioluminescence Assay HS II kit  
1113 (cat. #11699709001, Sigma) . PyMT cells were grown to 80% confluence prior to incubation at normoxia or  
1114 hypoxia for 24h (n=3 per genotype/condition). Cells were harvested and lysed using the kit lysis reagent  
1115 supplemented with cComplete EDTA-free tablets (Sigma, cat#4693132001). Luciferase reagent was added 1s  
1116 prior to a 10s integrated reading on a single-tube luminometer. A blank (reagent only) reading was  
1117 obtained and subtracted from all sample readings. An ATP standard curve was generated to plot  
1118 bioluminescence versus molarity on a log-log scale and used to calculate intracellular ATP concentrations.  
1119 DNA concentrations for each individual sample were measured using a Qubit® fluorometer (Life  
1120 Technologies), and ATP concentrations was normalized to total DNA.

1121

1122 **Chemotaxis assays**

1123 MDA-MB-231-NR cells transiently transfected (48h) with empty vector (EV, pCMV-6-Entry) or expressing  
1124 mCKB (+mCKB) were seeded at a density of 1,000 cells/per well of a 96-well ClearView chemotaxis plate  
1125 (cat. #4582, Sartorius) (n=4-6 technical replicates/cell line), which allows cell tracking in real-time through  
1126 optically clear membrane inserts. Cells were exposed to a reservoir containing DMEM +10% FBS as the  
1127 chemoattractant. The chemotaxis analysis software tool was used to quantify cell migration. Raw data were  
1128 normalized for initial plating density prior to export to Prism 9.0.

1129

1130 **Cytotoxicity assays**

1131 PyMT cells were seeded at 5,000 cells per well in 96-well dishes and allowed to adhere overnight. The  
1132 following day, growth medium (vehicle control) or cCr was added. A 10  $\mu$ M working stock solution of  
1133 CytoTox Green reagent (Sartorius, cat.# 4633) was made fresh and added to each well at a final  
1134 concentration of 250 nM. The plate was placed into the IncuCyte S3 instrument and cells were allowed to  
1135 equilibrate for approximately 1h before initiation of imaging; each well was imaged in three locations every  
1136 4h for a total of 48h. At the experimental endpoint, the phase and fluorescent masking software algorithms  
1137 were applied. The data were exported to Prism 9.0 and normalized to corresponding initial seeding density  
1138 measured by phase contrast. Data are representative of two independent biological experiments with n=6  
1139 technical replicates/time point/cell line.

1140

1141 **Cell cycle analysis of PyMT cells**

1142 PyMT EV or sh61 KD cells were plated into 6-well dishes and when sub-confluent were treated with vehicle  
1143 control or with 25 mM cCr for either 24h (added 24h prior to experiment endpoint) or 48h. Harvested cell  
1144 pellets were washed twice with cold PBS and re-suspended in 5mL ice-cold 70% ethanol prior to storage at  
1145 4°C. Prior to cytometry, samples were washed with PBS and treated with RNaseI. Setting aside an  
1146 unstained sample as the gating control, propidium iodide [50  $\mu$ g/mL] was added and incubated at 37°C for  
1147 15min prior to analysis on a BioRad ZE5 flow cytometer at the UTHSC Flow Cytometry and Cell Sorting  
1148 (FCCS) Core. Raw data were exported to ModFit for analysis (n=3 replicates/genotype/time point, and at  
1149 least duplicate biological replicates per time point).

1150

1151 **Tissue immunohistochemistry and immunostaining quantification**

1152 Harvested tumors were bisected with a razor and fixed for 8-24h in 10% neutral-buffered formalin (NBF),  
1153 followed by paraffin embedding and sectioning. Antigen retrieval was performed in 1x citrate buffer (pH  
1154 6.0) in a pressure cooker. Endogenous peroxidase was blocked by 3% H<sub>2</sub>O<sub>2</sub>/MeOH for 20 minutes, followed  
1155 by washing in water then PBS. All slides were blocked in 10% normal serum/PBST at least 1h at RT before  
1156 incubation of primary antibody overnight in humid chambers at 4°C. Slides were washed then stained with  
1157 the ABC Elite anti-rabbit kit (cat. # PK-6100, Vector Labs, Burlingame, CA) and developed using DAB  
1158 Impact (cat. #SK-4105, Vector Labs) and counterstained in hematoxylin (cat.# H3401, Vector Labs). Whole

1159 slides were digitally scanned using a 3DHISTECH PANORAMIC slide digitizer (3D Histech, Ltd. software,  
1160 Budapest, Hungary). Staining intensity was analyzed by pixel counts using built-in densitometry  
1161 algorithms for nuclear or cytoplasmic localization. Following masking to exclude necrosis, whole tumors  
1162 were analyzed after the general background was set using an adjacent tissue section developed without  
1163 primary antibody. Antibody reagents are listed in Supplementary Table S5.

1164

#### 1165 **Invadopodia assays using human TNBC cells**

1166 Glass coverslips were coated with OregonGreen-gelatin (cat. #G13186, ThermoFisher) as in [7]. Cells  
1167 (BT549, 12,000/well or MDA-MB-231, 15,000/well) were seeded onto coverslips in growth media containing  
1168 a reversible MMP inhibitor, batimistat (10 $\mu$ M; cat. # SML0041, Sigma) and incubated overnight. The next  
1169 day, the media was replaced with fresh growth media (vehicle) or cCr (25 mM) was also added. 12-well  
1170 plates containing seeded coverslips were placed into the IncuCyte S3 imager and simultaneously imaged  
1171 for green fluorescence and phase contrast (n=16 images/coverslip/time point). Green fluorescent area was  
1172 normalized to seeding density per image and graphed as a ratio of change over time in Prism 9.0. At the  
1173 end of the imaging, optimized per cell line, coverslips were fixed and immunostained prior to mounting  
1174 directly onto glass slides using ProLong Gold Antifade media (cat.# P36930, ThermoFisher). Coverslips  
1175 were imaged on a Nikon ECLIPSE Ti2 microscope as described.

1176

#### 1177 **Growth inhibition on TNBC cell lines during chemotherapy treatment**

1178 One day before measuring growth, cells were seeded into 96-well flat-bottomed plates such that assay  
1179 imaging would begin the next day at ~20% confluence (MDA-MB-468: 8,000 cells/well; MDA-MB-453:  
1180 12,000 cells/well; MDA-MB-231 or BT549 cells: 5,000 cells/well). At t = - 1h, growth media from seeded cells  
1181 was removed and each dilution of chemotherapy drug, or the vehicle control, was spiked into fresh media  
1182 containing either IncuCyte NuLight Rapid Red reagent (cat.# 4717, Sartorius) or Miami Green (cat.#  
1183 EMI001, Kerastat, Boston, MA) to enumerate cell nuclei. Plates were imaged in the IncuCyte S3 instrument.  
1184 Growth inhibition percentage was calculated relative to vehicle controls, as calculated by measurement of  
1185 red or green fluorescent units localized to the nucleus after applying the IncuCyte masking algorithm to  
1186 enumerate cell count. Data were exported to Prism 9.0 and normalized to initial seeding density. Drug  
1187 synergism was calculated using the isobole method [8], wherein a combination index of >1.0 indicates  
1188 antagonism, an index of ~1.0 is additive and an index of <1.0 suggests synergism.

1189

#### 1190 **Supplementary Materials and Methods References**

1191

1192 1. Schwab, L.P.; Peacock, D.L.; Majumdar, D.; Ingels, J.F.; Jensen, L.C.; Smith, K.D.; Cushing, R.C.;  
1193 Seagroves, T.N. Hypoxia-inducible factor 1 $\alpha$  promotes primary tumor growth and tumor-initiating cell  
1194 activity in breast cancer. *Breast Cancer Res* **2012**, *14*, R6, doi:10.1186/bcr3087.

1195 2. Network, C.G.A. Comprehensive molecular portraits of human breast tumours. *Nature* **2012**, *490*,  
1196 61-70, doi:10.1038/nature11412.

1197 3. Nagy, A.; Lanczky, A.; Menyhart, O.; Gyorffy, B. Validation of miRNA prognostic power in  
1198 hepatocellular carcinoma using expression data of independent datasets. *Sci Rep* **2018**, *8*, 9227,  
1199 doi:10.1038/s41598-018-27521-y.

1200 4. Brooks, D.L.; Schwab, L.P.; Krutilina, R.; Parke, D.N.; Sethuraman, A.; Hoogewijs, D.; Schorg, A.;  
1201 Gotwald, L.; Fan, M.; Wenger, R.H.; et al. ITGA6 is directly regulated by hypoxia-inducible factors and  
1202 enriches for cancer stem cell activity and invasion in metastatic breast cancer models. *Mol Cancer* **2016**, *15*,  
1203 26, doi:10.1186/s12943-016-0510-x.

1204 5. Oosthuyse, B.; Moons, L.; Storkebaum, E.; Beck, H.; Nuyens, D.; Brusselmans, K.; Van Dorpe, J.;  
1205 Hellings, P.; Gorselink, M.; Heymans, S.; et al. Deletion of the hypoxia-response element in the vascular

- 1206 endothelial growth factor promoter causes motor neuron degeneration. *Nature genetics* **2001**, *28*, 131-138,  
1207 doi:10.1038/88842.
- 1208 6. Choi, B.H.; Ha, Y.; Ahn, C.H.; Huang, X.; Kim, J.M.; Park, S.R.; Park, H.; Park, H.C.; Kim, S.W.; Lee,  
1209 M. A hypoxia-inducible gene expression system using erythropoietin 3' untranslated region for the gene  
1210 therapy of rat spinal cord injury. *Neurosci Lett* **2007**, *412*, 118-122, doi:10.1016/j.neulet.2006.11.015.
- 1211 7. Martin, K.H.; Hayes, K.E.; Walk, E.L.; Ammer, A.G.; Markwell, S.M.; Weed, S.A. Quantitative  
1212 measurement of invadopodia-mediated extracellular matrix proteolysis in single and multicellular  
1213 contexts. *J Vis Exp* **2012**, e4119, doi:10.3791/4119.
- 1214 8. Tallarida, R.J. An overview of drug combination analysis with isobolograms. *J Pharmacol Exp Ther*  
1215 **2006**, *319*, 1-7, doi:10.1124/jpet.106.104117.
- 1216

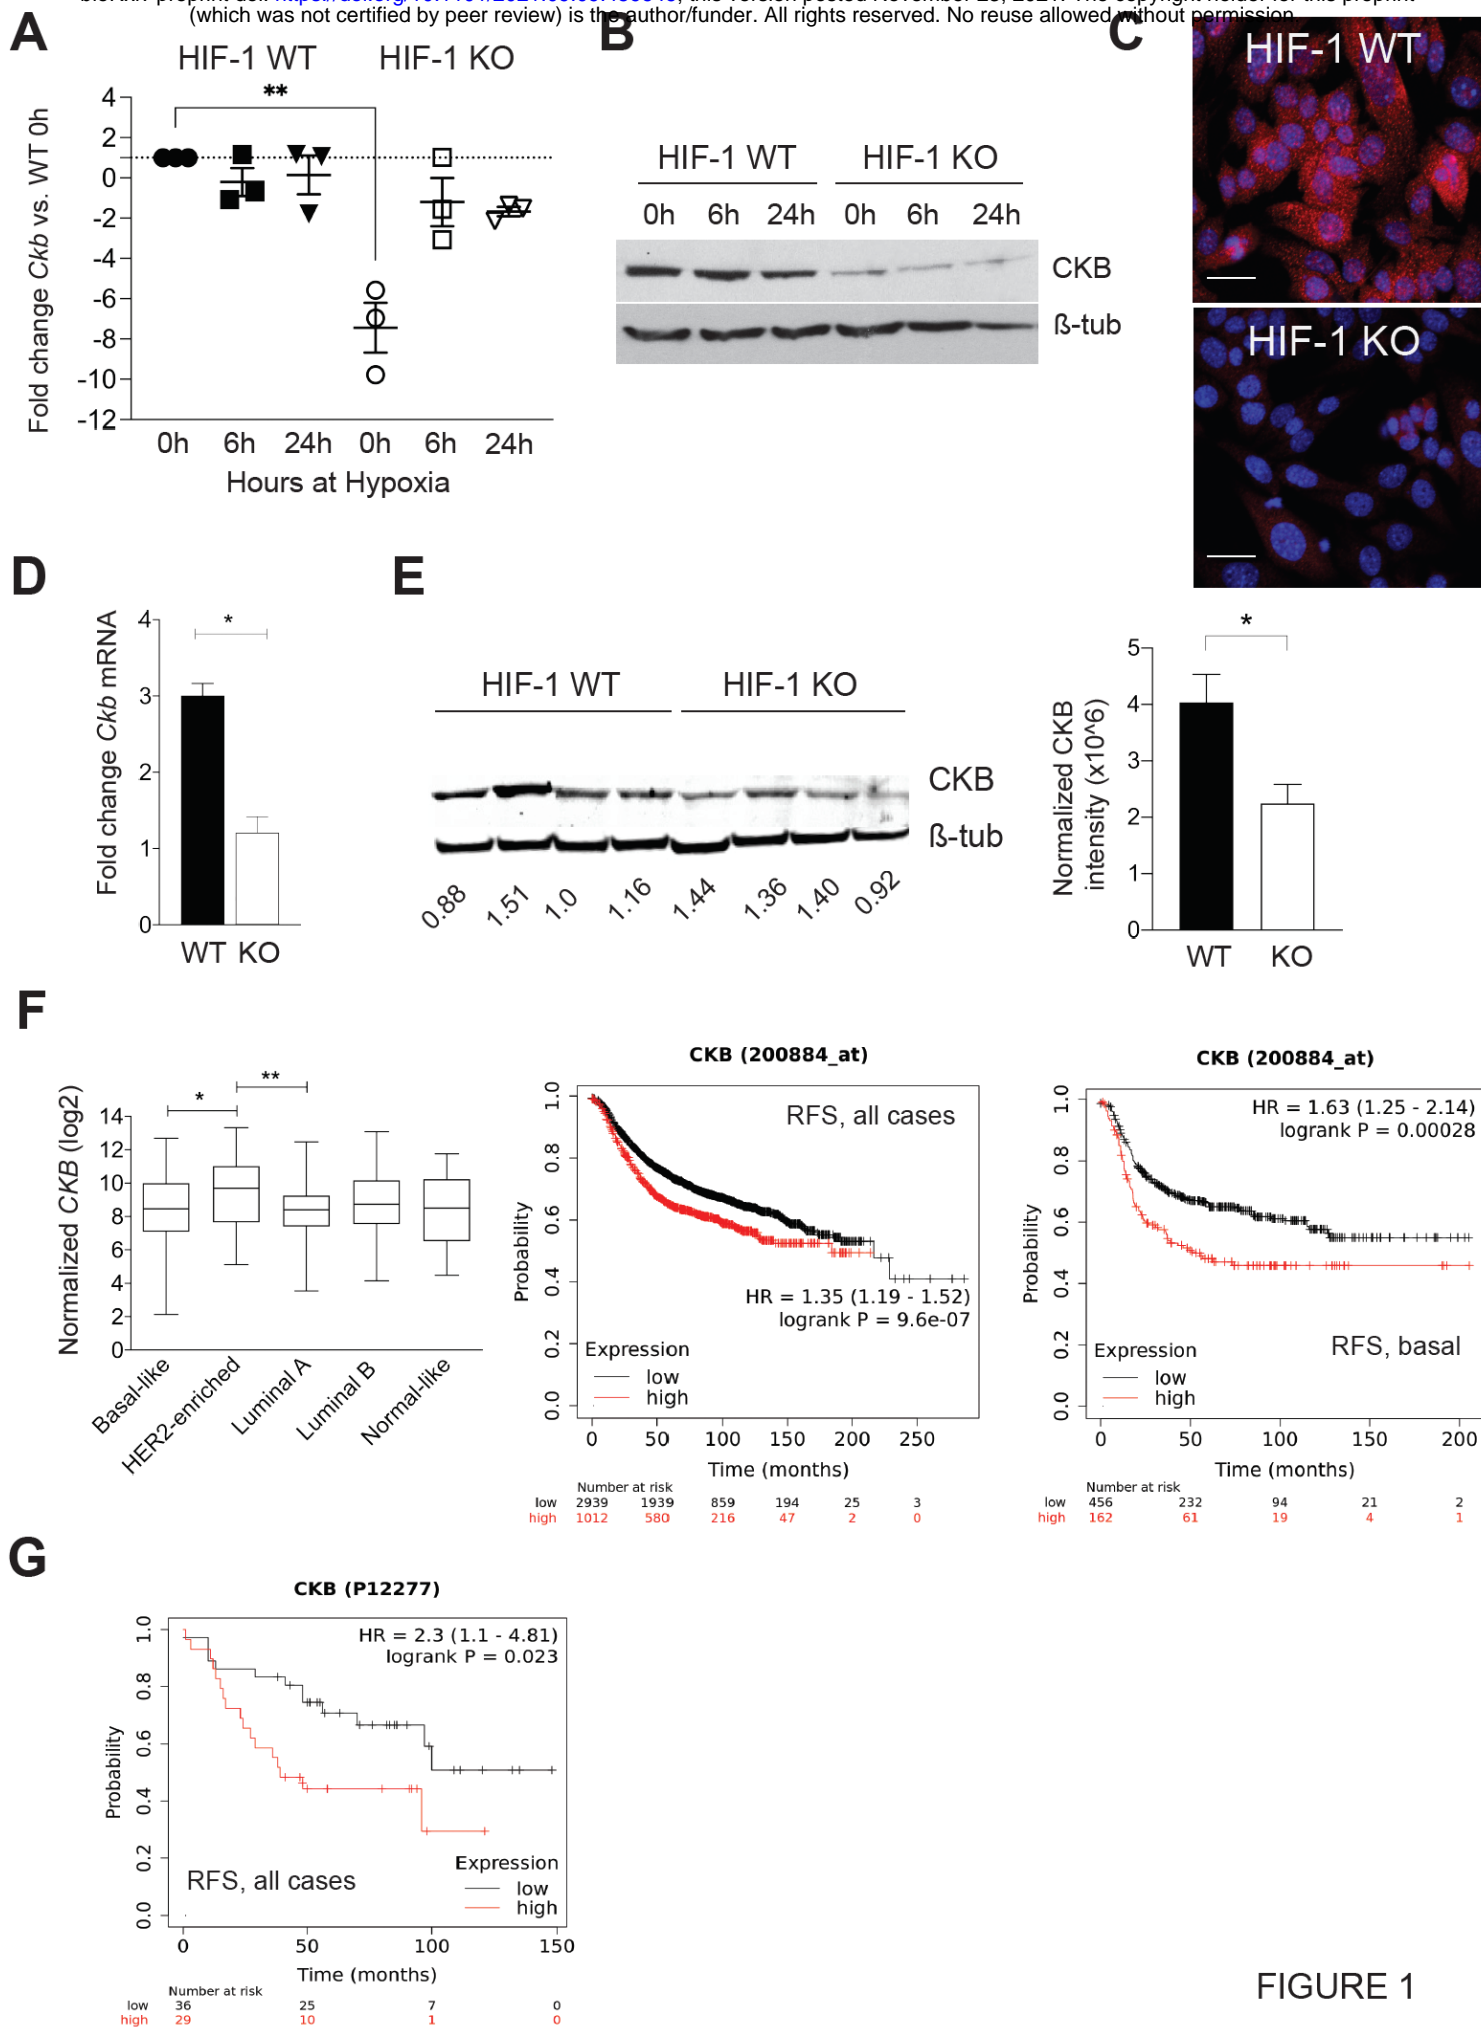

FIGURE 1

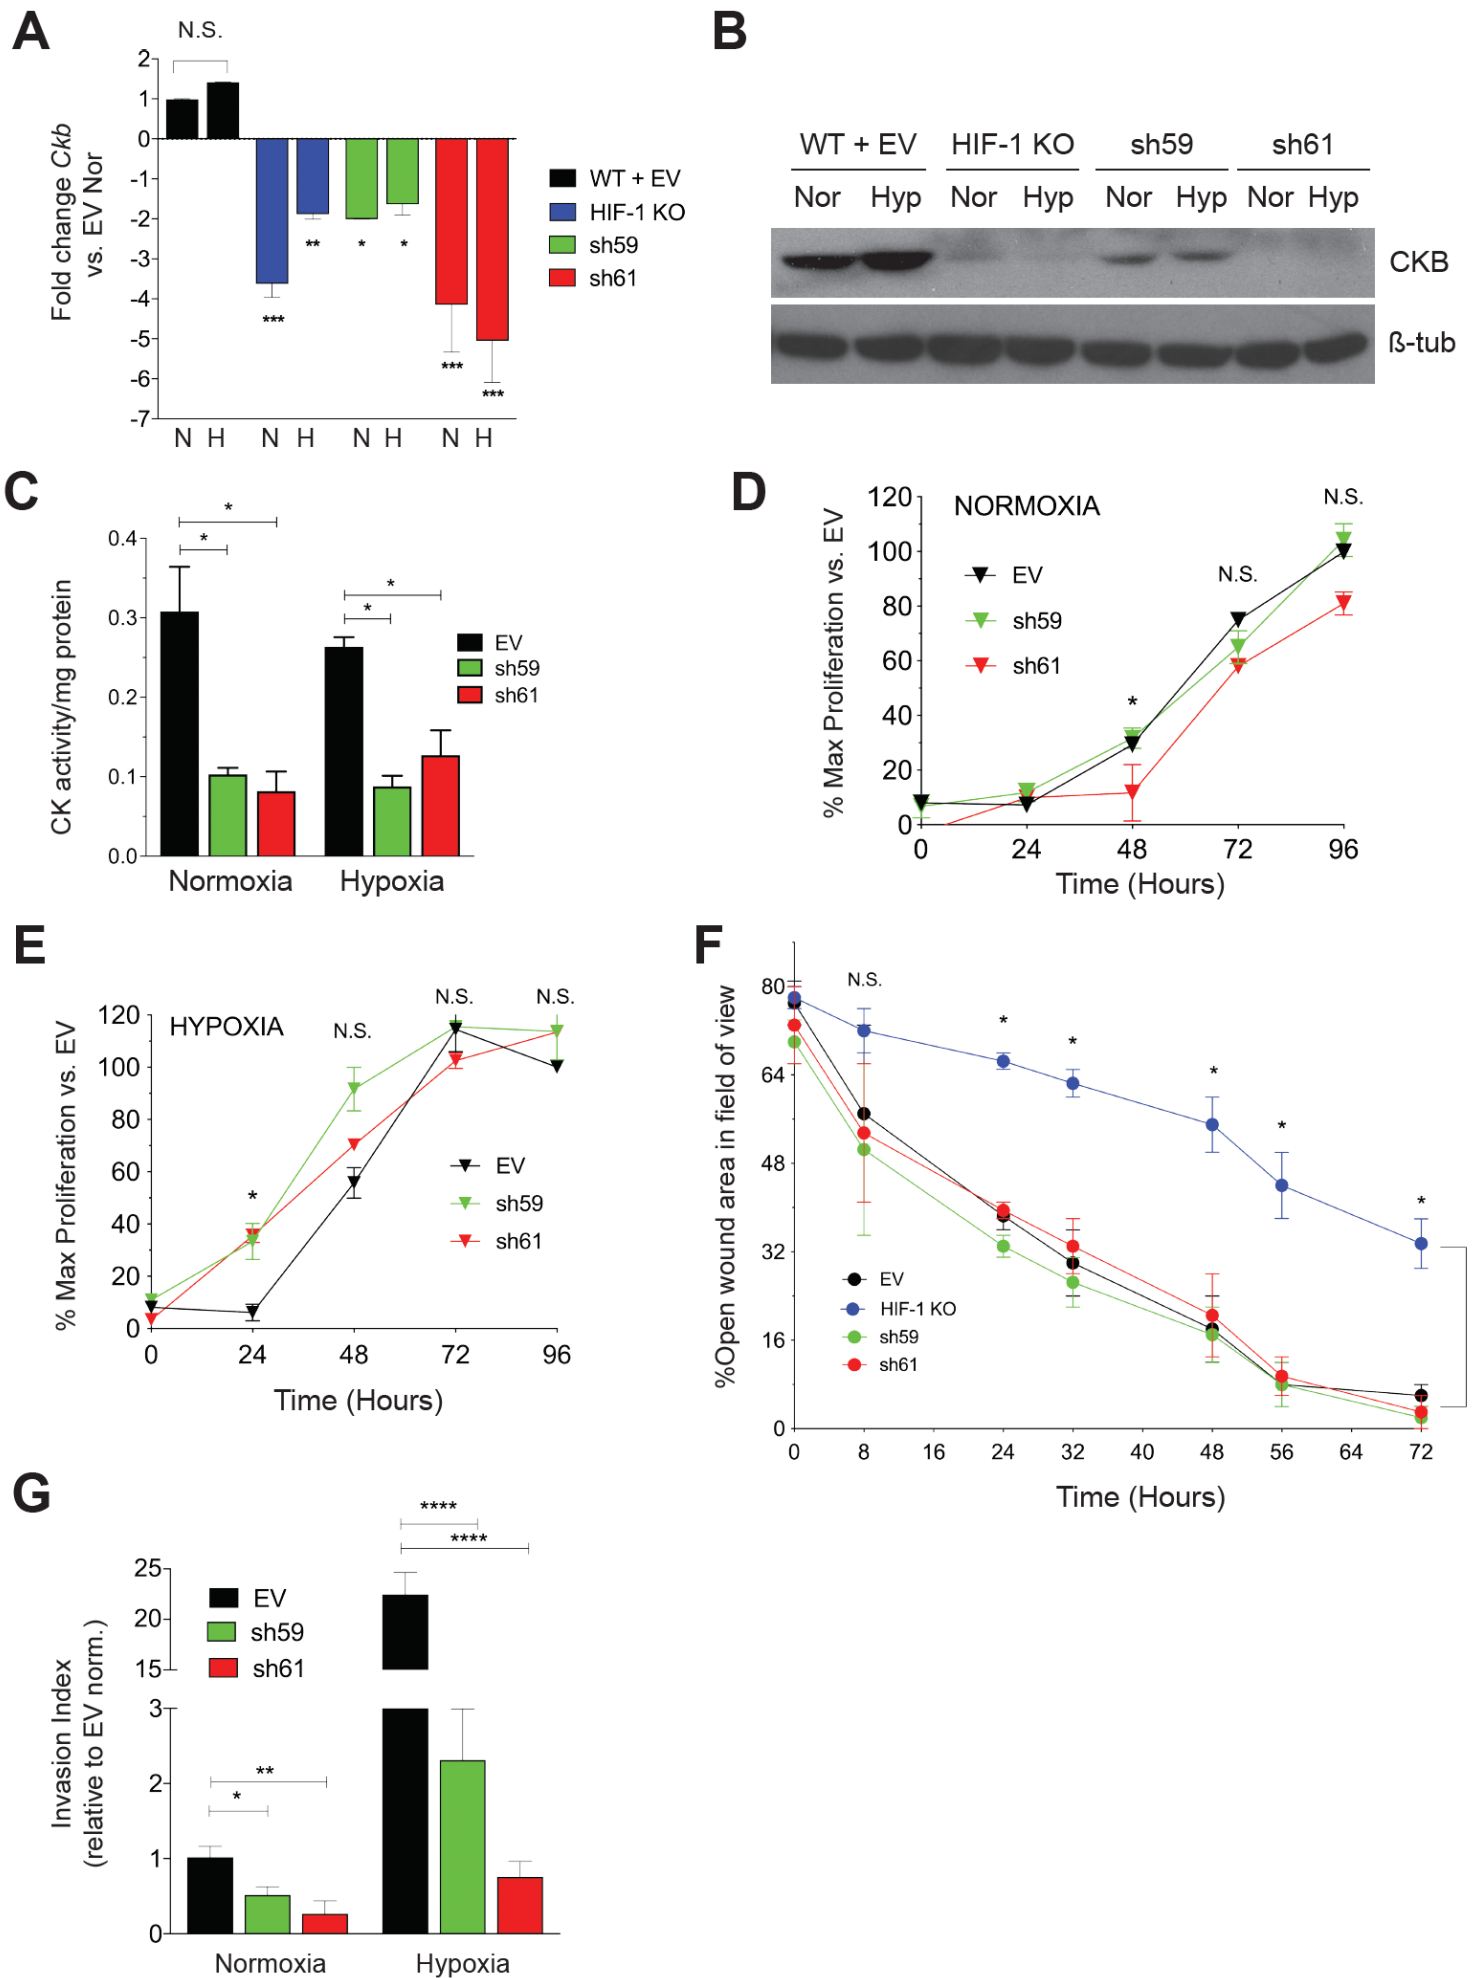

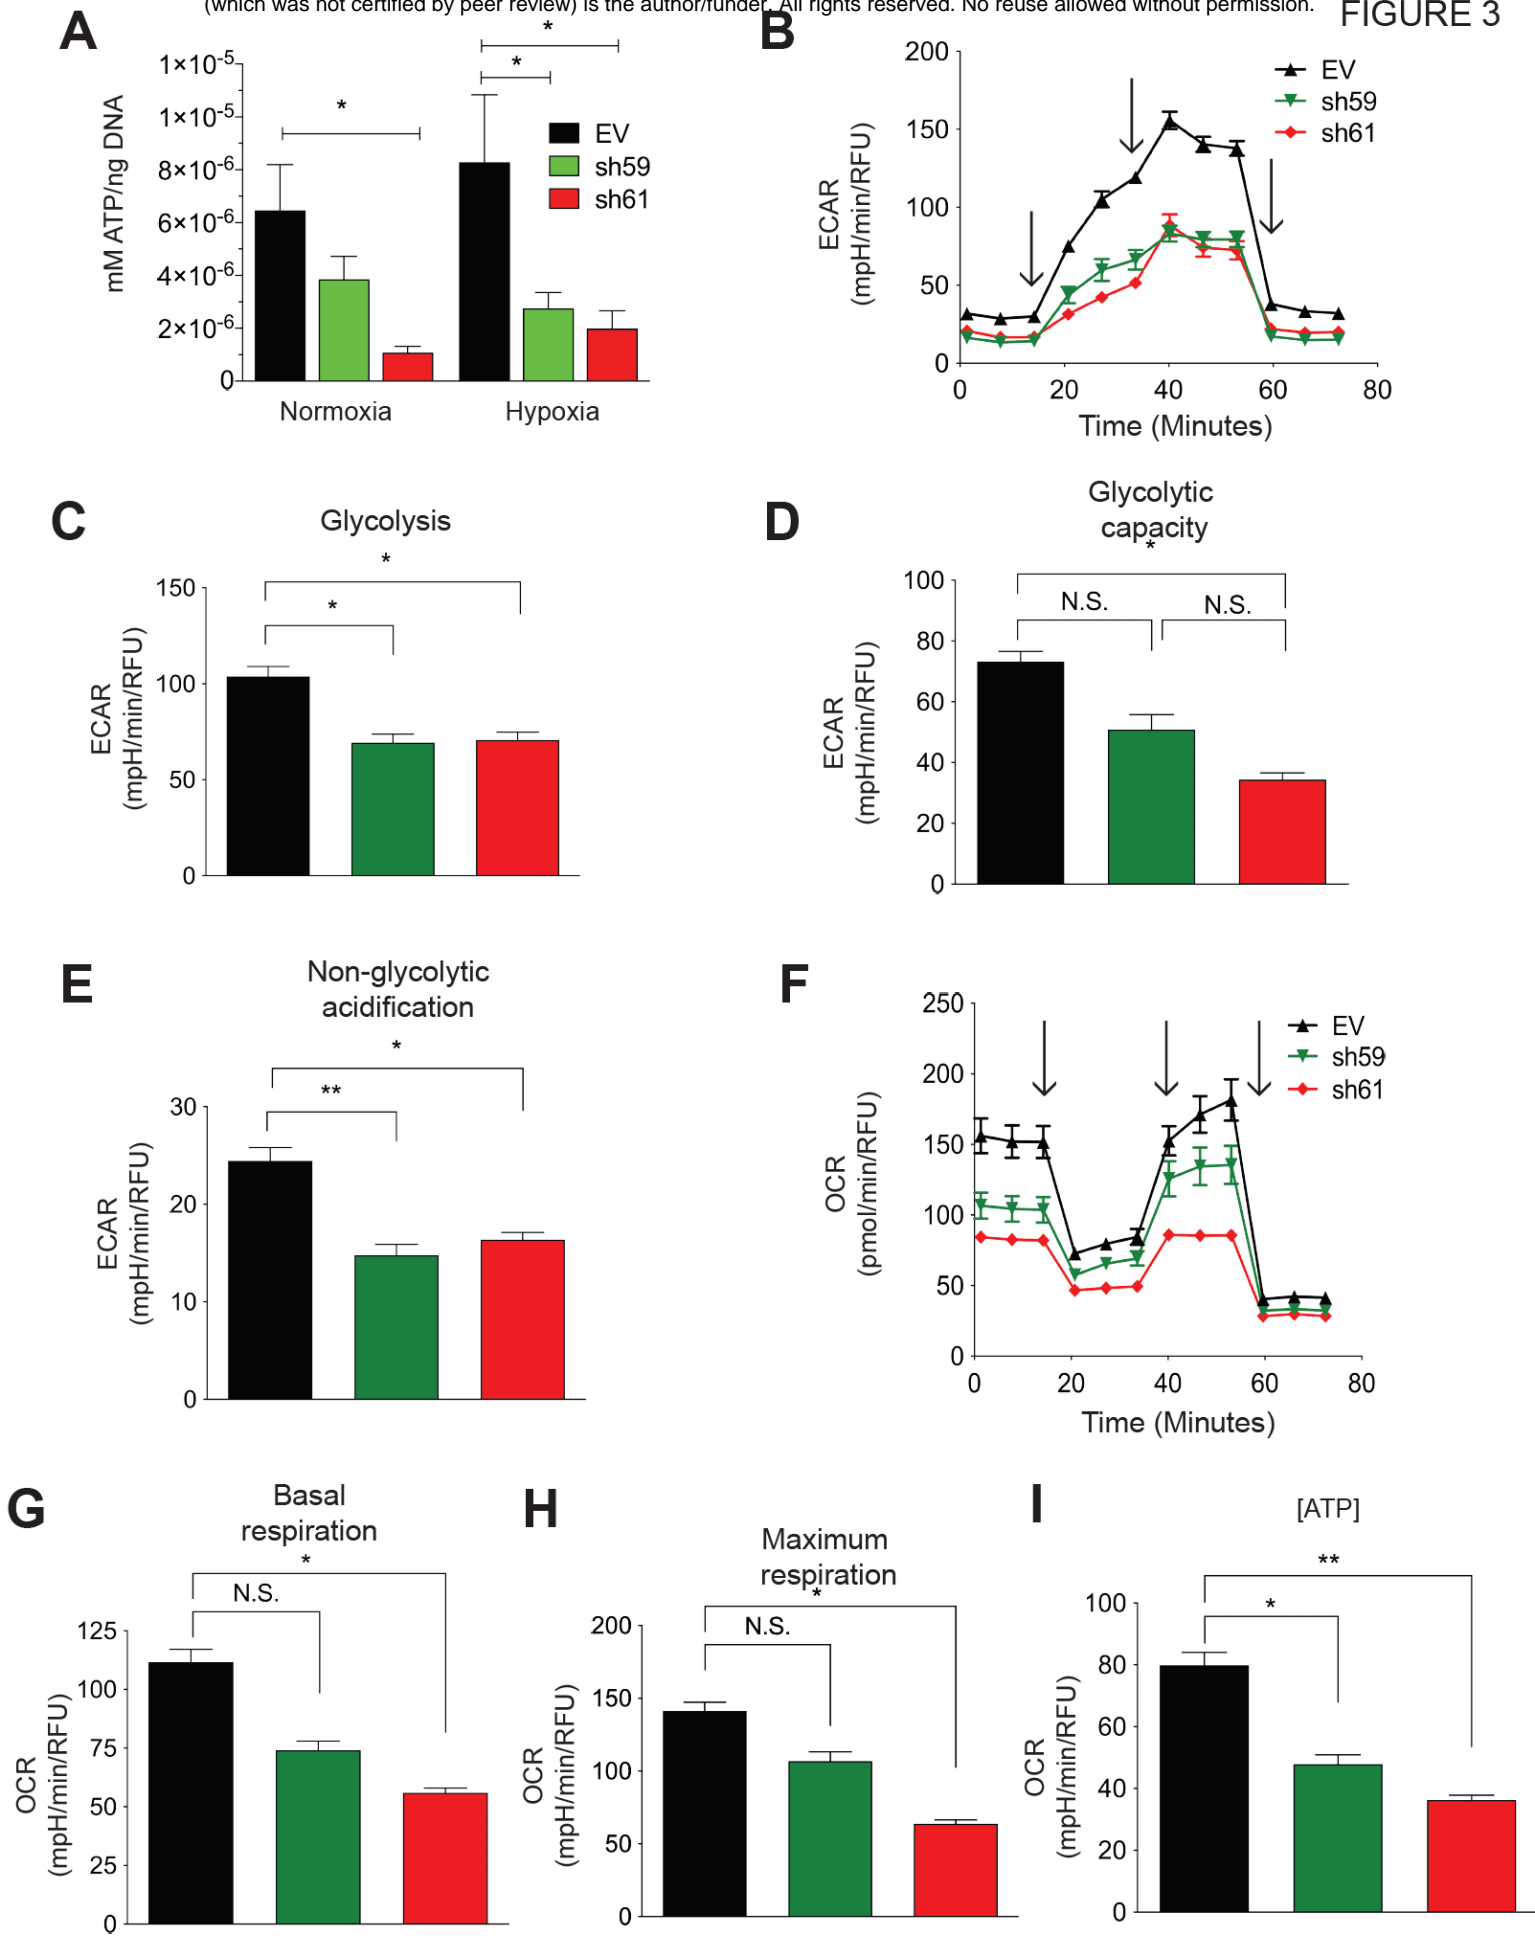

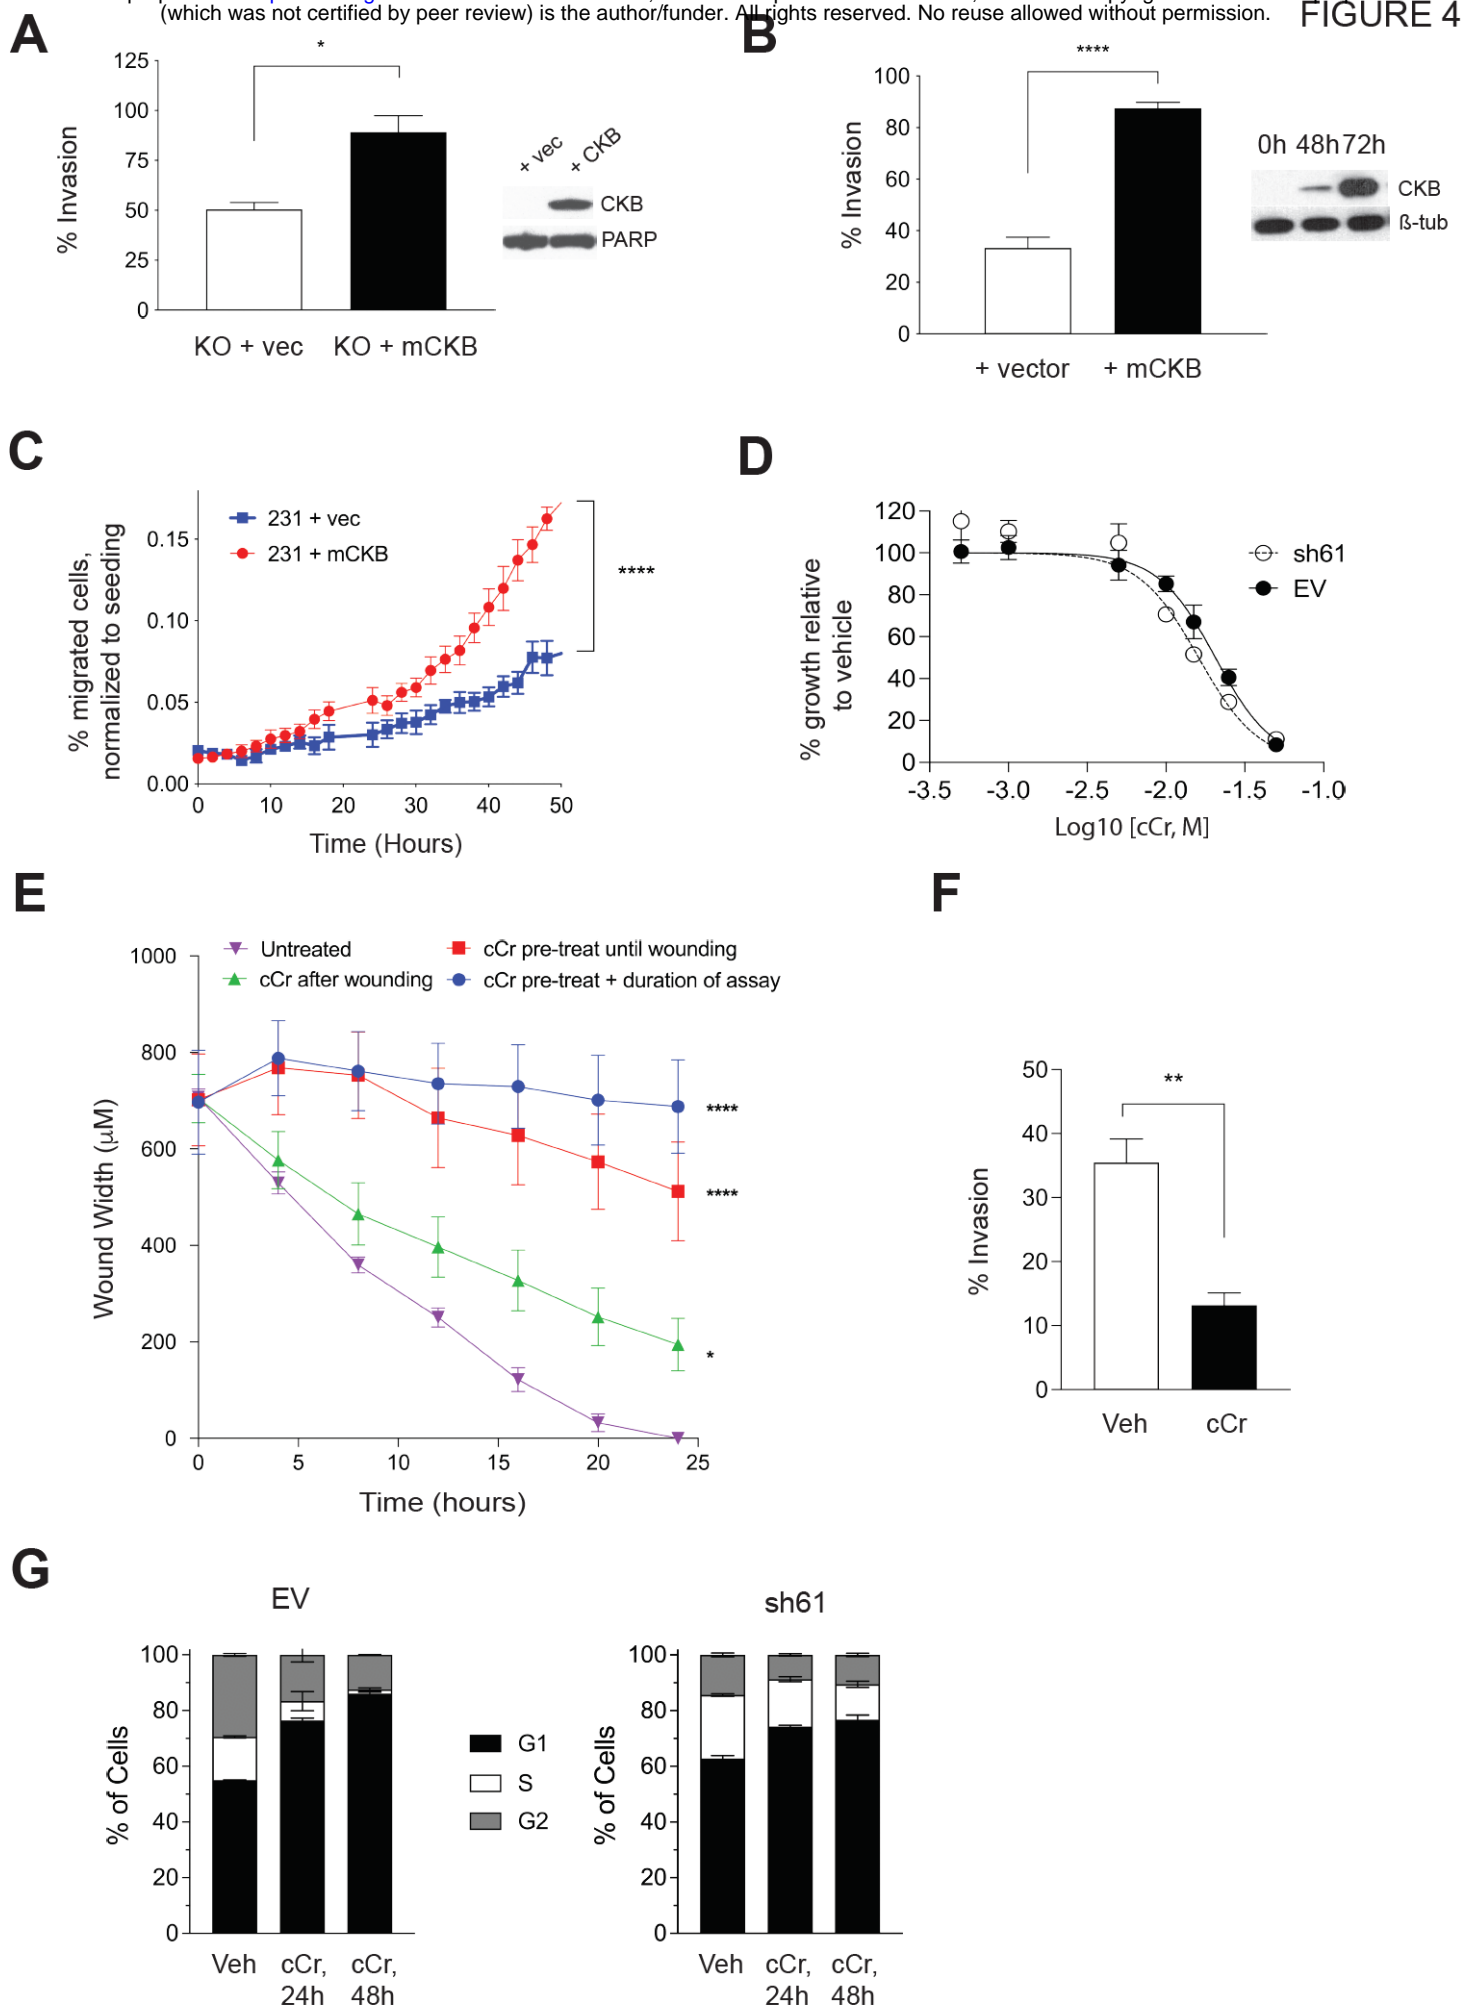



**A**

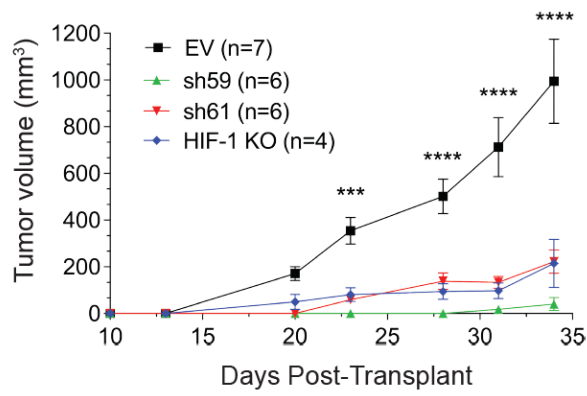

**B**

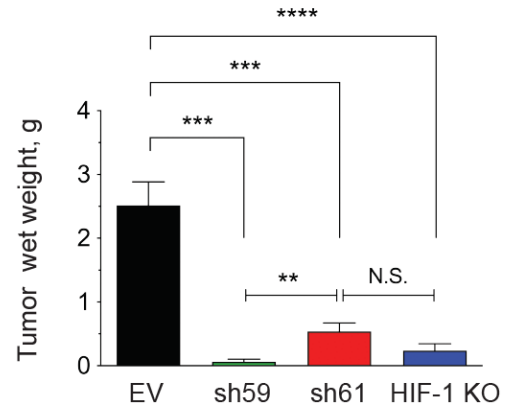

**C**

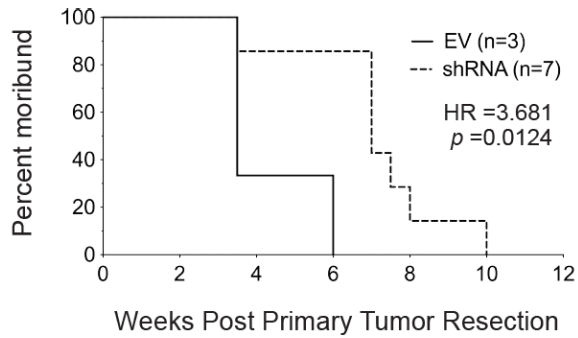

**D**

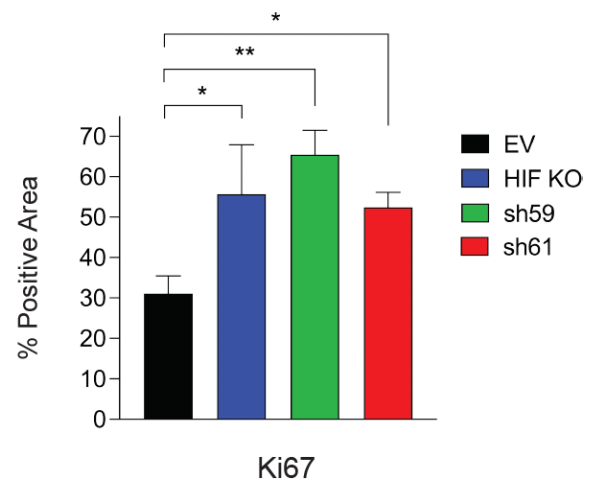

**E**

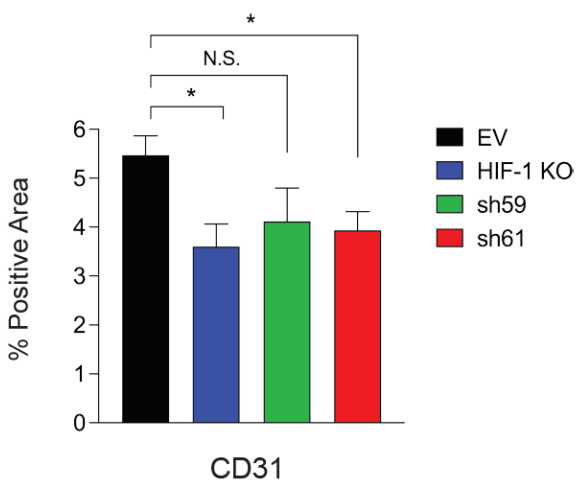

**F**

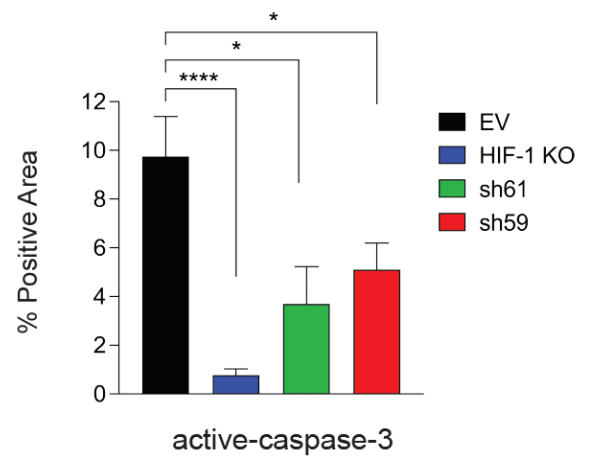

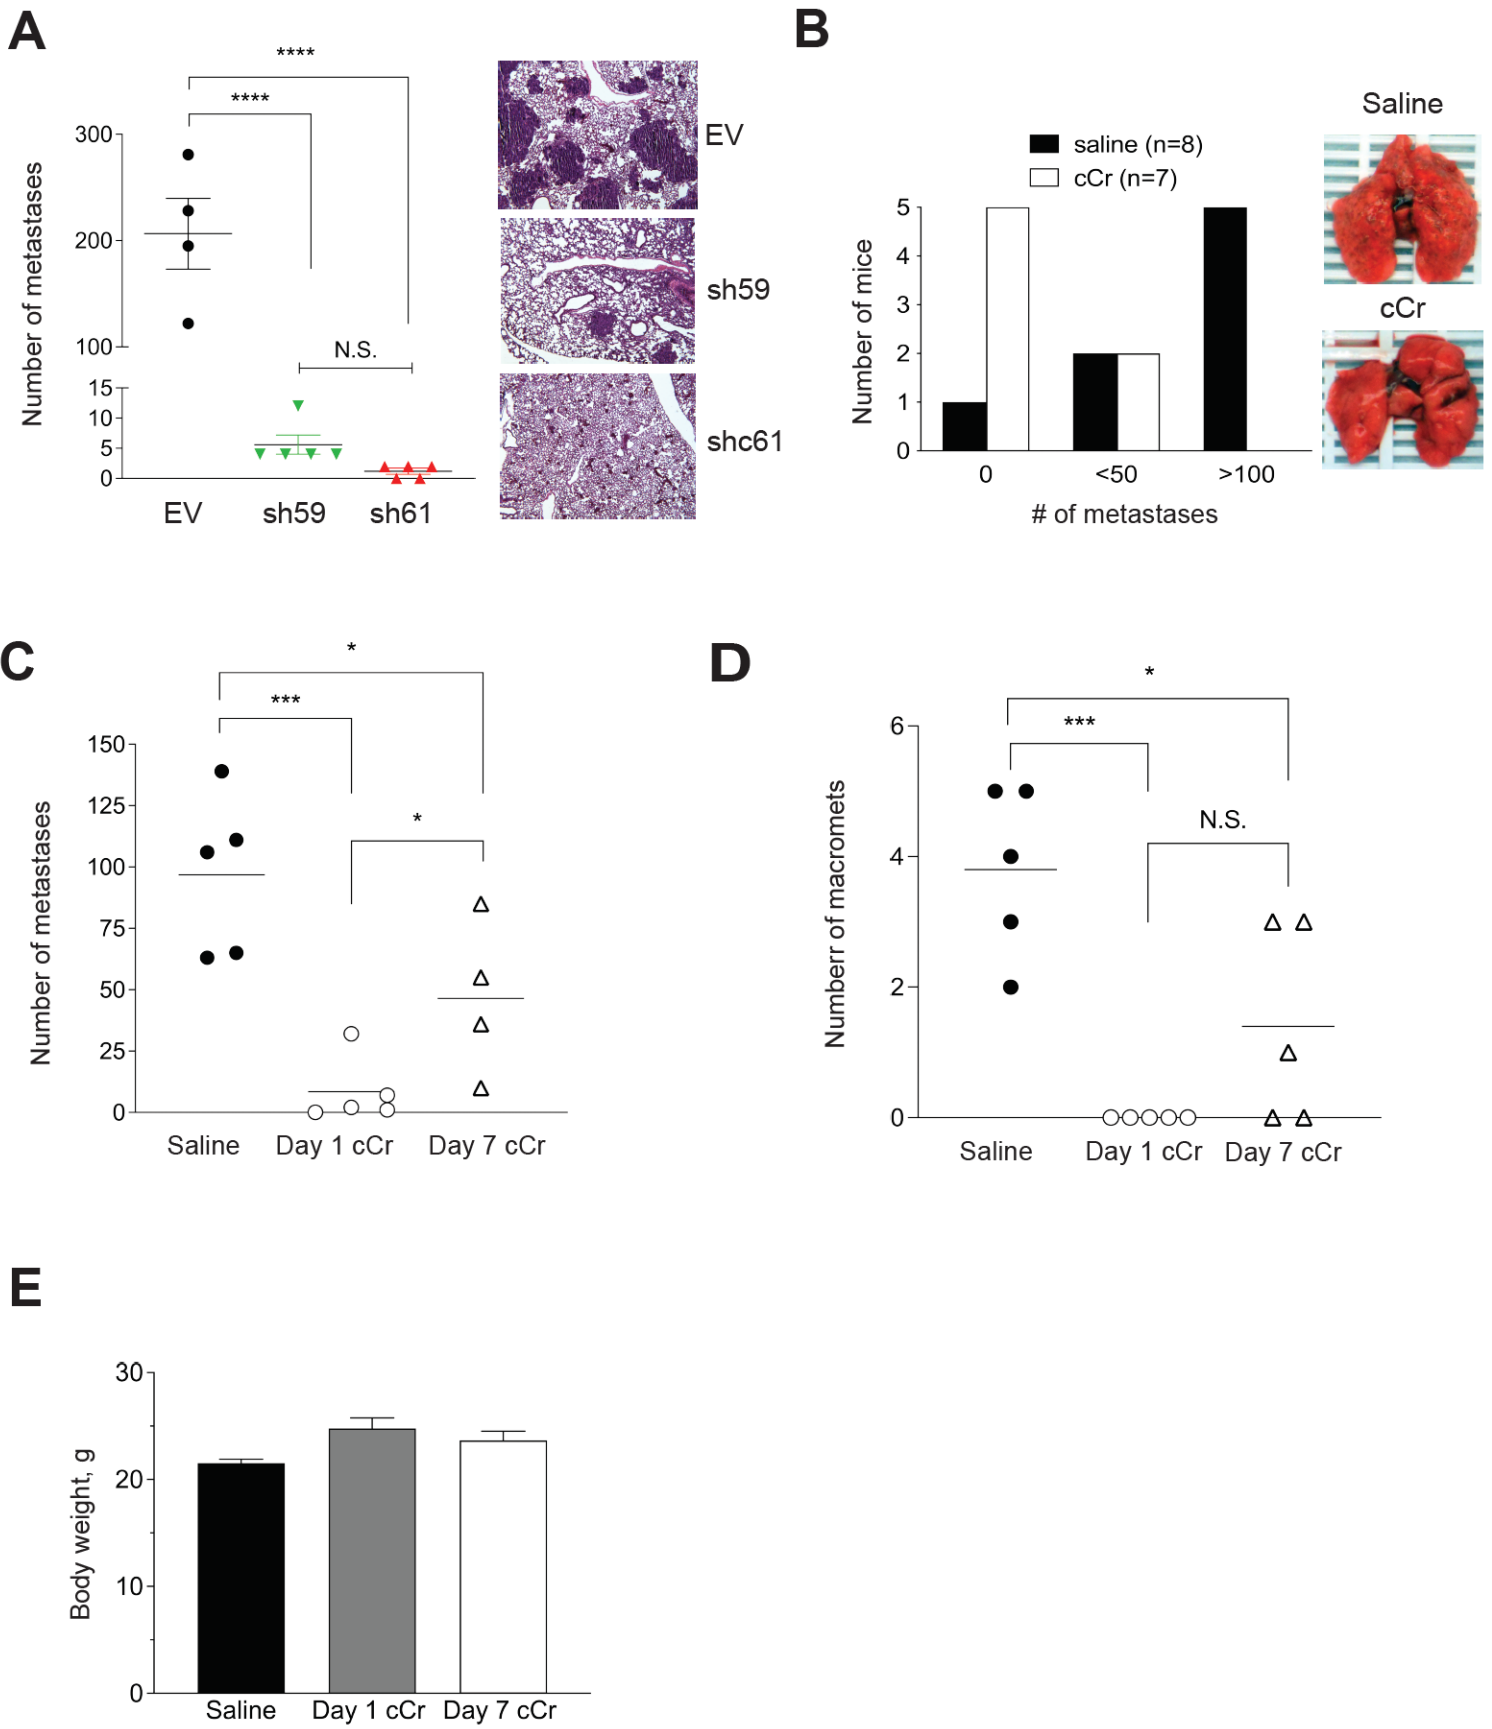

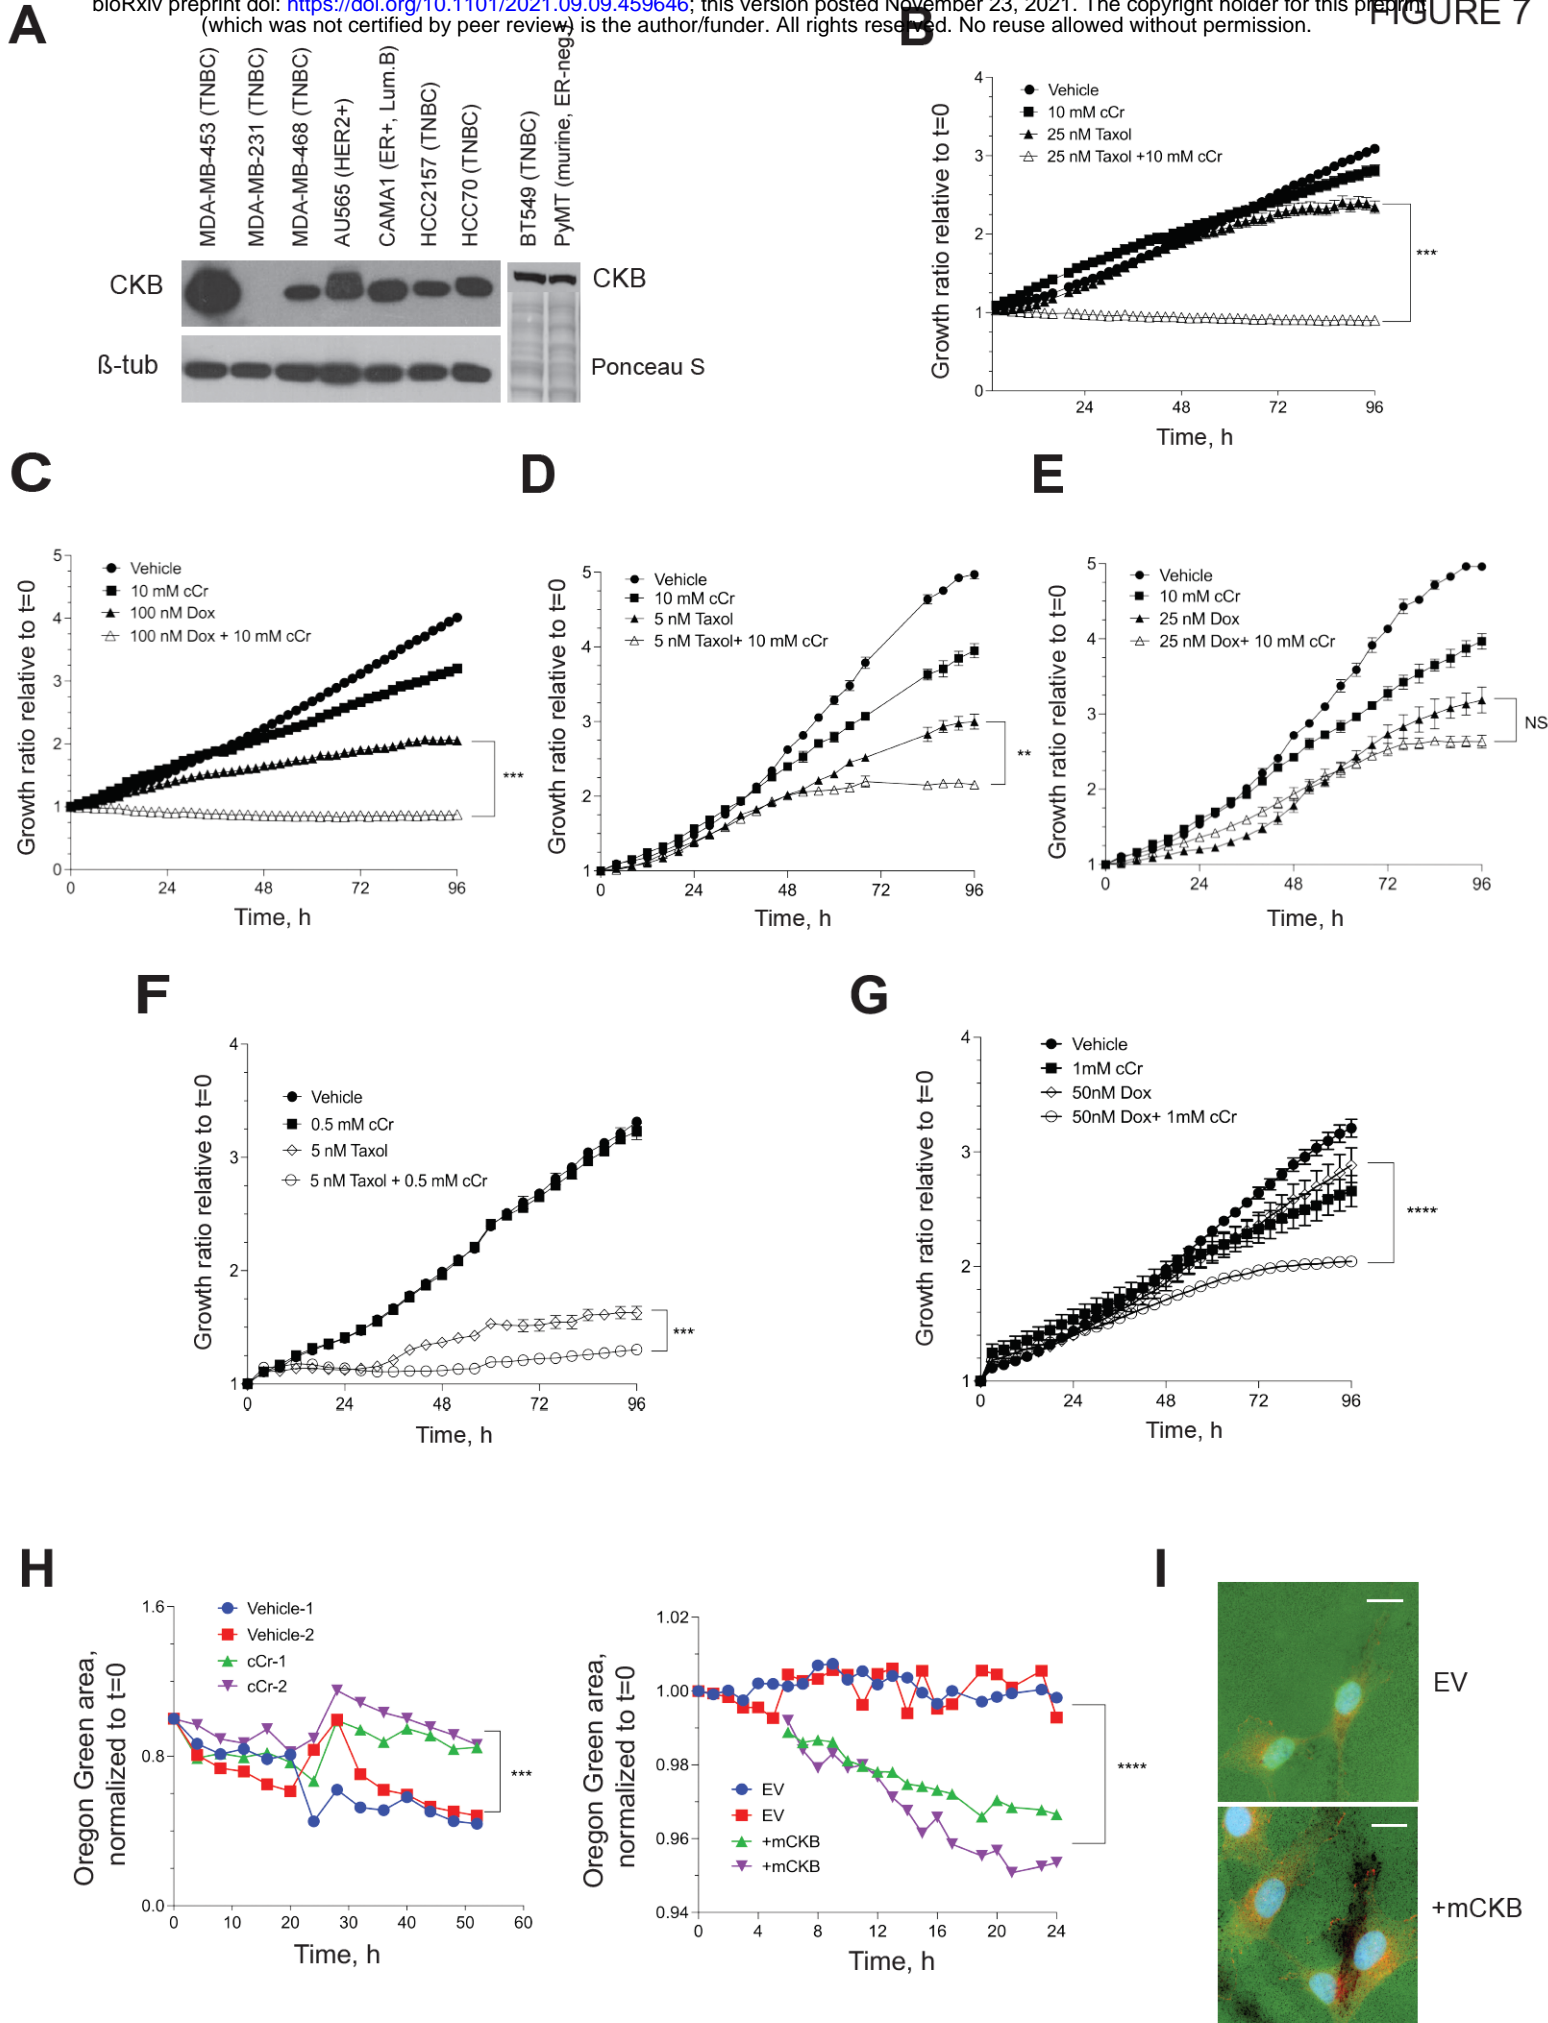

Source: https://www.biorxiv.org/content/10.1101/2021.09.09.459646v3.full.pdf
