# Supplementary material for: HIF-dependent CKB expression promotes breast cancer metastasis, whereas cyclocreatine therapy impairs cellular invasion and improves chemotherapy efficacy
Source: bioRxiv or medRxiv preprint supplement (doi:10.1101/2021.09.09.459646), 2021-11-23
Supplement: Supplementary file [file media-4.pdf]

## Supplementary Tables

**Table S4.** Primers and Roche Universal Probe Library (UPL) FAM-labeled probes utilized in real-time PCR assays. All assays were designed using the Roche Universal ProbeLibrary Assay Design Center.

| Gene                                    | Forward Primer         | Reverse Primer       | UPL ID |
|-----------------------------------------|------------------------|----------------------|--------|
| <i>Ckb</i> (murine)                     | gcaagcacaggcatccat     | cgcagcttctgcgtattatg | 70     |
| <i>CKB</i> (human)                      | cctgcccagaaatgaagc     | gcactgcccaggcaataa   | 38     |
| <i>Ints3</i> (murine)                   | gtggctgtattgactctgcac  | caggttccccatcatcacat | 17     |
| <i>Krt18</i><br>(murine K18)            | agatgacaccaacatcacaagg | cttcagaccttgacttctct | 78     |
| <i>PPIA</i><br>( <i>Cyclophilin A</i> ) | atgctggaccaacacaaat    | tcttctacttgccaaacacc | 48     |

**Table S5.** Primary antibody source and dilution factors utilized in western blotting, immunofluorescence (IF) staining of cultured cells and DAB-based immunohistochemistry (IHC) staining of tumor tissues.

| Antibody                    | Source and Catalog #                                  | Dilution | Purpose   |
|-----------------------------|-------------------------------------------------------|----------|-----------|
| anti-CKB                    | AbCAM (#ab88746)                                      | 1:5,000  | western   |
| anti- $\beta$ -tubulin      | AbCam (#ab6046)                                       | 1:10,000 | western   |
| anti-HIF-1 $\alpha$         | Novus Biologicals (#NB100-479)                        | 1:5,000  | western   |
| anti-PARP                   | Cell Signaling Technology (#9542)                     | 1:5,000  | western   |
| anti-CKB                    | ThermoFisher (PA5-21382) or<br>Santa Cruz, sc-271531) | 1:500    | IF, cells |
| anti-alpha tubulin          | ThermoFisher (#62204)                                 | 1:250    | IF, cells |
| anti-cortactin              | Millipore (#05-0180)                                  | 1:700    | IF, cells |
| anti-mouse AlexaFluor-488   | LifeTech (#A21202)                                    | 1:400    | IF, cells |
| anti-rabbit AlexaFluor-594  | LifeTech (#A21203)                                    | 1:400    | IF, cells |
| anti-rabbit-IgG-Biotin-X    | LifeTech (#A16027)                                    | 1:400    | IF, cells |
| Streptavidin-AlexaFluor-594 | LifeTech (#S11227)                                    | 1:400    | IF, cells |
| anti-Ki67                   | AbCAM (#ab-15580)                                     | 1:750    | IHC       |
| anti-CD31                   | Cell Signaling Technology<br>(#77699)                 | 1:100    | IHC       |
| anti-activated caspase3     | Cell Signaling Technology (#9661)                     | 1:100    | IHC       |

**Table S6.** Primers used in chromatin immunoprecipitation (ChIP) assays in murine PyMT tumor cells and in human MCF-7 cells.

| <b>Genomic Region</b>       | <b>IP Antibody</b> | <b>Forward Primer</b>            | <b>Reverse Primer</b>        |
|-----------------------------|--------------------|----------------------------------|------------------------------|
| -258 <i>CKB</i>             | HIF-1 $\alpha$     | gatgaaccaagcgtctc                | agacctcgaggccgaaac           |
| -935 <i>CKB</i>             | HIF-1 $\alpha$     | attgctgggtcacggagtt              | tacccccaacactcccagat         |
| -1869 <i>CKB</i><br>non-HRE | HIF-1 $\alpha$     | ttcaggttttgtgggtagc              | ctgttccaagccagcatttt         |
| -1326 <i>Ckb</i>            | HIF-1 $\alpha$     | cagggctgttctggactctc             | cctcacaagtgtgggatta          |
| -1835 <i>Ckb</i>            | HIF-1 $\alpha$     | tgctcctgtgcacttttt               | agcctagcttcagagaactaa<br>tgg |
| -510 <i>Ckb</i> non-<br>HRE | HIF-1 $\alpha$     | cttggcggtgttccttagag             | caggccatatcctcaagagc         |
| <i>EPO</i>                  | HIF-1 $\alpha$     | gctggcctctggctctcatgg            | cagggttggcagctgccttact<br>g  |
| <i>Vegf</i>                 | HIF-1 $\alpha$     | ctggcttcagttccctggcaacat<br>ctct | cctggggtgaatgggatcctct<br>gg |

**Table S7.** *Ckb* shRNA targeting sequences obtained from The RNAi Consortium (TRC) library purchased through Open Biosystems.

| <b>Clone ID</b> | <b>Clone Name</b>       | <b>Target Sequence</b> |
|-----------------|-------------------------|------------------------|
| TRCN0000024659  | NM_021273.2-<br>300s1c1 | cgacgtattcaaggacctctt  |
| TRCN0000024660  | NM_021273.2-<br>288s1c1 | cgaggagagttacgacgtatt  |
| TRCN0000024661  | NM_021273.2-<br>708s1c1 | gcacaatgacaataagacttt  |
